# Supplementary material
Source: ML conference proceedings conference paper supplement (https://proceedings.neurips.cc/paper_files/paper/2021/hash/1415fe9fea0fa1e45dddcff5682239a0-Abstract.html)
Supplement: Supplementary file 1 [file 1415fe9fea0fa1e45dddcff5682239a0-Supplemental.pdf]

## A Details of Experimental Setup

### A.1 Code

Code is available at <https://github.com/matsuolab/T3A>.

### A.2 Total amount of compute

We run our experiments mainly on cloud V100x4 or A100x8 instances, depending on the memory usage of the backbone networks. We used approximately 1500 hours for the v100x4 instances and 400 hours for the a100x8 instances. Note that the computational time was mainly consumed to reproduce prior results (training base models with ERM and CORAL). Our method only has negligible computational overhead, as mentioned in Section 3.2.

### A.3 License of assets

**Datasets** VLCS is a combination of 4 datasets: Caltech101 (unspecified), PASCAL VOC (Flicks terms of use), LabelME (unspecified) and SUN09 (unspecified). PACS is a combination of several sources: Caltech256 (unspecified), Sketchy (Apache-2.0 for the download script, dataset unspecified), TU-Berlin (CC BY 4.0) and Google Images (unspecified). OfficeHome (non-commercial research and educational purposes). TerraIncognita (CDLA-Permissive-1.0).

**Codes** `DomainBed` (MIT License), `torch-vision` for ResNet18 and ResNet50 (Apache-2.0), the official repository of Big Transfer (Apache-2.0), `timm` for Vision Transformer and MLP-Mixer (Apache-2.0), and the official repository of Tent (MIT License).

### A.4 Hyperparameters

Following [52], we conduct a random search of 20 trials over a joint distribution of all hyperparameters. Namely, for both ERM and CORAL, learning rate is selected from  $10^{\text{Uniform}(-5, -3.5)}$ , batch size is selected from  $2^{\text{Uniform}(3, 5.5)}$ , dropout rate is selected from  $[0, 0.1, 0.5]$ , and weight decay is selected from  $10^{\text{Uniform}(-6, -2)}$ .

### A.5 Trial seeds

For the results of Table 1 and Figure 2, we used three seeds  $\{0, 1, 2\}$  in `DomainNet` library, which is the same with the original paper. For the results of Table 2 we used three seeds  $\{10, 11, 12\}$  as well.

## B Full Results

This section contains the full results of the entire experiment—for example, Appendix B.1 shows the full results of Table 1 per dataset and domain. Please refer to the main text for the detailed notation of each chart.

### B.1 Full Results for Table 1

| Algorithm | C                 | L                 | S                 | V                 | Avg         |
|-----------|-------------------|-------------------|-------------------|-------------------|-------------|
| ERM       | 97.7 ± 0.4        | 64.3 ± 0.9        | 73.4 ± 0.5        | 74.6 ± 1.3        | 77.5        |
| IRM       | 98.6 ± 0.1        | 64.9 ± 0.9        | 73.4 ± 0.6        | 77.3 ± 0.9        | 78.5        |
| GroupDRO  | 97.3 ± 0.3        | 63.4 ± 0.9        | 69.5 ± 0.8        | 76.7 ± 0.7        | 76.7        |
| Mixup     | 98.3 ± 0.6        | 64.8 ± 1.0        | 72.1 ± 0.5        | 74.3 ± 0.8        | 77.4        |
| MLDG      | 97.4 ± 0.2        | 65.2 ± 0.7        | 71.0 ± 1.4        | 75.3 ± 1.0        | 77.2        |
| CORAL     | 98.3 ± 0.1        | 66.1 ± 1.2        | 73.4 ± 0.3        | 77.5 ± 1.2        | 78.8        |
| MMD       | 97.7 ± 0.1        | 64.0 ± 1.1        | 72.8 ± 0.2        | 75.3 ± 3.3        | 77.5        |
| DANN      | 99.0 ± 0.3        | 65.1 ± 1.4        | 73.1 ± 0.3        | 77.2 ± 0.6        | 78.6        |
| CDANN     | 97.1 ± 0.3        | 65.1 ± 1.2        | 70.7 ± 0.8        | 77.1 ± 1.5        | 77.5        |
| MTL       | 97.8 ± 0.4        | 64.3 ± 0.3        | 71.5 ± 0.7        | 75.3 ± 1.7        | 77.2        |
| SagNet    | 97.9 ± 0.4        | 64.5 ± 0.5        | 71.4 ± 1.3        | 77.5 ± 0.5        | 77.8        |
| ARM       | 98.7 ± 0.2        | 63.6 ± 0.7        | 71.3 ± 1.2        | 76.7 ± 0.6        | 77.6        |
| VREx      | 98.4 ± 0.3        | 64.4 ± 1.4        | 74.1 ± 0.4        | 76.2 ± 1.3        | 78.3        |
| RSC       | 97.9 ± 0.1        | 62.5 ± 0.7        | 72.3 ± 1.2        | 75.6 ± 0.8        | 77.1        |
| ERM**     | 97.7 ± 0.1        | 64.1 ± 0.8        | 72.5 ± 0.9        | 76.7 ± 0.5        | 77.7        |
| +T3A      | <b>99.1 ± 0.4</b> | <b>67.5 ± 0.6</b> | <b>76.8 ± 1.2</b> | 76.6 ± 0.3        | <b>80.0</b> |
| +Tent-BN  | 83.3 ± 2.0        | 60.7 ± 0.2        | 61.7 ± 1.1        | 67.2 ± 0.8        | 68.2        |
| +Tent-C   | <b>97.8 ± 0.2</b> | <b>64.3 ± 1.0</b> | 68.3 ± 0.8        | <b>77.5 ± 0.2</b> | 77.0        |
| CORAL**   | 97.6 ± 0.2        | 65.1 ± 0.8        | 73.7 ± 1.0        | 78.0 ± 0.2        | 78.6        |
| +T3A      | <b>98.9 ± 0.2</b> | <b>67.1 ± 1.0</b> | <b>75.2 ± 1.3</b> | 76.9 ± 0.6        | <b>79.5</b> |
| +Tent-BN  | 87.1 ± 0.3        | 60.4 ± 1.7        | 67.8 ± 0.7        | 70.3 ± 0.6        | 71.4        |
| +Tent-C   | 97.4 ± 0.2        | 64.7 ± 1.0        | 72.1 ± 0.7        | <b>78.3 ± 0.2</b> | 78.1        |

Table 4: Full results for Table 1 on VLCS.

| Algorithm | A                 | C                 | P                 | S                 | Avg         |
|-----------|-------------------|-------------------|-------------------|-------------------|-------------|
| ERM       | 84.7 ± 0.4        | 80.8 ± 0.6        | 97.2 ± 0.3        | 79.3 ± 1.0        | 85.5        |
| IRM       | 84.8 ± 1.3        | 76.4 ± 1.1        | 96.7 ± 0.6        | 76.1 ± 1.0        | 83.5        |
| GroupDRO  | 83.5 ± 0.9        | 79.1 ± 0.6        | 96.7 ± 0.3        | 78.3 ± 2.0        | 84.4        |
| Mixup     | 86.1 ± 0.5        | 78.9 ± 0.8        | 97.6 ± 0.1        | 75.8 ± 1.8        | 84.6        |
| MLDG      | 85.5 ± 1.4        | 80.1 ± 1.7        | 97.4 ± 0.3        | 76.6 ± 1.1        | 84.9        |
| CORAL     | 88.3 ± 0.2        | 80.0 ± 0.5        | 97.5 ± 0.3        | 78.8 ± 1.3        | 86.2        |
| MMD       | 86.1 ± 1.4        | 79.4 ± 0.9        | 96.6 ± 0.2        | 76.5 ± 0.5        | 84.6        |
| DANN      | 86.4 ± 0.8        | 77.4 ± 0.8        | 97.3 ± 0.4        | 73.5 ± 2.3        | 83.6        |
| CDANN     | 84.6 ± 1.8        | 75.5 ± 0.9        | 96.8 ± 0.3        | 73.5 ± 0.6        | 82.6        |
| MTL       | 87.5 ± 0.8        | 77.1 ± 0.5        | 96.4 ± 0.8        | 77.3 ± 1.8        | 84.6        |
| SagNet    | 87.4 ± 1.0        | 80.7 ± 0.6        | 97.1 ± 0.1        | 80.0 ± 0.4        | 86.3        |
| ARM       | 86.8 ± 0.6        | 76.8 ± 0.5        | 97.4 ± 0.3        | 79.3 ± 1.2        | 85.1        |
| VREx      | 86.0 ± 1.6        | 79.1 ± 0.6        | 96.9 ± 0.5        | 77.7 ± 1.7        | 84.9        |
| RSC       | 85.4 ± 0.8        | 79.7 ± 1.8        | 97.6 ± 0.3        | 78.2 ± 1.2        | 85.2        |
| ERM**     | 85.0 ± 0.8        | 77.9 ± 2.0        | 97.1 ± 0.5        | 74.6 ± 1.6        | 83.6        |
| +T3A      | <b>86.3 ± 0.9</b> | <b>80.3 ± 0.9</b> | <b>97.5 ± 0.4</b> | <b>77.1 ± 1.4</b> | <b>85.3</b> |
| +Tent-BN  | <b>86.3 ± 0.1</b> | <b>80.0 ± 0.9</b> | 96.9 ± 0.3        | <b>76.1 ± 1.0</b> | <b>84.8</b> |
| +Tent-C   | 84.9 ± 0.9        | <b>78.2 ± 2.2</b> | 97.1 ± 0.5        | 68.9 ± 3.5        | 82.3        |
| CORAL**   | 86.6 ± 0.5        | 77.0 ± 1.0        | 97.6 ± 0.1        | 75.7 ± 1.3        | 84.2        |
| +T3A      | <b>87.7 ± 0.6</b> | <b>78.9 ± 0.6</b> | <b>97.8 ± 0.1</b> | <b>78.1 ± 0.8</b> | <b>85.6</b> |
| +Tent-BN  | <b>87.9 ± 0.3</b> | <b>78.5 ± 0.7</b> | 97.5 ± 0.1        | <b>78.2 ± 0.3</b> | <b>85.6</b> |
| +Tent-C   | <b>87.3 ± 1.0</b> | 76.7 ± 1.2        | 97.6 ± 0.1        | 73.3 ± 2.6        | 83.7        |

Table 5: Full results for Table 1 on PACS.

| Algorithm | A                 | C                 | P                 | R                 | Avg         |
|-----------|-------------------|-------------------|-------------------|-------------------|-------------|
| ERM       | 61.3 ± 0.7        | 52.4 ± 0.3        | 75.8 ± 0.1        | 76.6 ± 0.3        | 66.5        |
| IRM       | 58.9 ± 2.3        | 52.2 ± 1.6        | 72.1 ± 2.9        | 74.0 ± 2.5        | 64.3        |
| GroupDRO  | 60.4 ± 0.7        | 52.7 ± 1.0        | 75.0 ± 0.7        | 76.0 ± 0.7        | 66.0        |
| Mixup     | 62.4 ± 0.8        | 54.8 ± 0.6        | 76.9 ± 0.3        | 78.3 ± 0.2        | 68.1        |
| MLDG      | 61.5 ± 0.9        | 53.2 ± 0.6        | 75.0 ± 1.2        | 77.5 ± 0.4        | 66.8        |
| CORAL     | 65.3 ± 0.4        | 54.4 ± 0.5        | 76.5 ± 0.1        | 78.4 ± 0.5        | 68.7        |
| MMD       | 60.4 ± 0.2        | 53.3 ± 0.3        | 74.3 ± 0.1        | 77.4 ± 0.6        | 66.3        |
| DANN      | 59.9 ± 1.3        | 53.0 ± 0.3        | 73.6 ± 0.7        | 76.9 ± 0.5        | 65.9        |
| CDANN     | 61.5 ± 1.4        | 50.4 ± 2.4        | 74.4 ± 0.9        | 76.6 ± 0.8        | 65.8        |
| MTL       | 61.5 ± 0.7        | 52.4 ± 0.6        | 74.9 ± 0.4        | 76.8 ± 0.4        | 66.4        |
| SagNet    | 63.4 ± 0.2        | 54.8 ± 0.4        | 75.8 ± 0.4        | 78.3 ± 0.3        | 68.1        |
| ARM       | 58.9 ± 0.8        | 51.0 ± 0.5        | 74.1 ± 0.1        | 75.2 ± 0.3        | 64.8        |
| VREx      | 60.7 ± 0.9        | 53.0 ± 0.9        | 75.3 ± 0.1        | 76.6 ± 0.5        | 66.4        |
| RSC       | 60.7 ± 1.4        | 51.4 ± 0.3        | 74.8 ± 1.1        | 75.1 ± 1.3        | 65.5        |
| ERM**     | 59.8 ± 0.3        | 53.9 ± 0.5        | 75.1 ± 0.2        | 76.8 ± 0.5        | 66.4        |
| +T3A      | <b>61.6 ± 0.1</b> | <b>56.0 ± 0.3</b> | <b>77.3 ± 0.2</b> | <b>78.2 ± 0.3</b> | <b>68.3</b> |
| +Tent-BN  | <b>62.1 ± 0.4</b> | <b>55.1 ± 0.5</b> | 74.6 ± 0.0        | 76.2 ± 0.6        | <b>67.0</b> |
| +Tent-C   | 59.2 ± 0.2        | 51.6 ± 0.8        | <b>75.2 ± 0.3</b> | 76.7 ± 0.3        | 65.7        |
| CORAL**   | 64.3 ± 0.4        | 54.3 ± 0.2        | 76.5 ± 0.3        | 78.0 ± 0.4        | 68.3        |
| +T3A      | 64.2 ± 0.3        | <b>56.1 ± 0.2</b> | <b>78.1 ± 0.1</b> | <b>78.6 ± 0.3</b> | <b>69.2</b> |
| +Tent-BN  | <b>65.6 ± 0.5</b> | <b>56.5 ± 0.3</b> | 76.3 ± 0.1        | <b>78.4 ± 0.3</b> | <b>69.2</b> |
| +Tent-C   | 64.2 ± 0.2        | 54.0 ± 0.2        | 76.4 ± 0.3        | <b>78.1 ± 0.4</b> | 68.2        |

Table 6: Full results for Table 1 on OfficeHome.

| Algorithm | L100              | L38               | L43        | L46               | Avg         |
|-----------|-------------------|-------------------|------------|-------------------|-------------|
| ERM       | 49.8 ± 4.4        | 42.1 ± 1.4        | 56.9 ± 1.8 | 35.7 ± 3.9        | 46.1        |
| IRM       | 54.6 ± 1.3        | 39.8 ± 1.9        | 56.2 ± 1.8 | 39.6 ± 0.8        | 47.6        |
| GroupDRO  | 41.2 ± 0.7        | 38.6 ± 2.1        | 56.7 ± 0.9 | 36.4 ± 2.1        | 43.2        |
| Mixup     | 59.6 ± 2.0        | 42.2 ± 1.4        | 55.9 ± 0.8 | 33.9 ± 1.4        | 47.9        |
| MLDG      | 54.2 ± 3.0        | 44.3 ± 1.1        | 55.6 ± 0.3 | 36.9 ± 2.2        | 47.7        |
| CORAL     | 51.6 ± 2.4        | 42.2 ± 1.0        | 57.0 ± 1.0 | 39.8 ± 2.9        | 47.6        |
| MMD       | 41.9 ± 3.0        | 34.8 ± 1.0        | 57.0 ± 1.9 | 35.2 ± 1.8        | 42.2        |
| DANN      | 51.1 ± 3.5        | 40.6 ± 0.6        | 57.4 ± 0.5 | 37.7 ± 1.8        | 46.7        |
| CDANN     | 47.0 ± 1.9        | 41.3 ± 4.8        | 54.9 ± 1.7 | 39.8 ± 2.3        | 45.8        |
| MTL       | 49.3 ± 1.2        | 39.6 ± 6.3        | 55.6 ± 1.1 | 37.8 ± 0.8        | 45.6        |
| SagNet    | 53.0 ± 2.9        | 43.0 ± 2.5        | 57.9 ± 0.6 | 40.4 ± 1.3        | 48.6        |
| ARM       | 49.3 ± 0.7        | 38.3 ± 2.4        | 55.8 ± 0.8 | 38.7 ± 1.3        | 45.5        |
| VREx      | 48.2 ± 4.3        | 41.7 ± 1.3        | 56.8 ± 0.8 | 38.7 ± 3.1        | 46.4        |
| RSC       | 50.2 ± 2.2        | 39.2 ± 1.4        | 56.3 ± 1.4 | 40.8 ± 0.6        | 46.6        |
| ERM**     | 50.4 ± 2.4        | 45.1 ± 0.7        | 52.3 ± 1.3 | 38.1 ± 0.5        | 46.5        |
| +T3A      | 48.6 ± 2.1        | <b>45.7 ± 1.1</b> | 52.1 ± 1.5 | <b>41.5 ± 1.5</b> | <b>47.0</b> |
| +Tent-BN  | <b>53.1 ± 1.3</b> | 42.6 ± 0.9        | 46.6 ± 0.5 | 36.5 ± 0.5        | 44.7        |
| +Tent-C   | <b>51.2 ± 1.7</b> | 44.9 ± 0.5        | 50.4 ± 0.7 | 35.5 ± 0.9        | 45.5        |
| CORAL**   | 54.0 ± 3.4        | 43.3 ± 1.3        | 55.5 ± 1.4 | 39.4 ± 0.3        | 48.1        |
| +T3A      | 49.1 ± 1.2        | <b>44.3 ± 1.1</b> | 54.6 ± 0.7 | <b>41.1 ± 0.7</b> | 47.3        |
| +Tent-BN  | 51.0 ± 0.8        | <b>44.2 ± 0.9</b> | 52.2 ± 1.1 | 38.7 ± 0.6        | 46.5        |
| +Tent-C   | <b>55.0 ± 3.7</b> | 42.1 ± 0.6        | 55.5 ± 1.6 | 38.7 ± 0.3        | 47.8        |

Table 7: Full results for Table 1 on TerraIncognita.

## B.2 Full Results for Table 2

Table 8: Full results for Table 2 of resnet18.

| (a) VLCS |                   |                   |                   |                   |      | (b) PACS          |                   |                   |                   |      |  |
|----------|-------------------|-------------------|-------------------|-------------------|------|-------------------|-------------------|-------------------|-------------------|------|--|
|          | C                 | L                 | S                 | V                 | Avg  | A                 | C                 | P                 | S                 | Avg  |  |
| ERM      | 95.8 ± 0.4        | 60.4 ± 1.1        | 66.4 ± 0.8        | 70.2 ± 1.5        | 73.2 | 78.7 ± 1.3        | 74.3 ± 0.6        | 92.4 ± 0.2        | 75.6 ± 0.8        | 80.3 |  |
| +T3C     | <b>99.2 ± 0.3</b> | <b>64.5 ± 1.2</b> | <b>69.4 ± 1.0</b> | <b>73.0 ± 1.9</b> | 76.5 | <b>80.4 ± 0.7</b> | <b>75.2 ± 0.4</b> | <b>94.7 ± 0.5</b> | <b>76.5 ± 0.2</b> | 81.7 |  |
| +Tent-BN | 82.6 ± 0.6        | 50.8 ± 1.2        | 54.5 ± 1.7        | 57.3 ± 1.5        | 61.3 | <b>78.8 ± 0.8</b> | <b>76.3 ± 0.4</b> | <b>92.8 ± 0.3</b> | 73.9 ± 0.2        | 80.5 |  |
| +Tent-C  | <b>96.1 ± 0.7</b> | 57.4 ± 2.1        | 65.1 ± 1.1        | 67.4 ± 2.1        | 71.5 | 78.1 ± 1.8        | 74.3 ± 0.6        | <b>92.5 ± 0.3</b> | 75.0 ± 1.0        | 80.0 |  |

  

| (c) OfficeHome |                   |                   |                   |                   |      | (d) TerraIncognita |                   |            |            |      |  |
|----------------|-------------------|-------------------|-------------------|-------------------|------|--------------------|-------------------|------------|------------|------|--|
|                | A                 | C                 | P                 | R                 | Avg  | L100               | L38               | L43        | L46        | Avg  |  |
| ERM            | 46.1 ± 0.4        | 45.8 ± 0.3        | 65.0 ± 0.3        | 66.0 ± 0.3        | 55.7 | 41.6 ± 3.1         | 36.0 ± 3.0        | 51.0 ± 0.2 | 33.9 ± 1.0 | 40.7 |  |
| +T3C           | <b>47.0 ± 0.2</b> | <b>46.8 ± 1.0</b> | <b>68.0 ± 0.2</b> | <b>66.1 ± 0.4</b> | 57.0 | <b>48.6 ± 2.5</b>  | <b>41.0 ± 1.9</b> | 44.7 ± 0.7 | 31.8 ± 0.9 | 41.6 |  |
| +Tent-BN       | <b>46.5 ± 0.1</b> | 44.6 ± 0.4        | 62.1 ± 0.4        | 62.5 ± 0.2        | 53.9 | <b>49.6 ± 0.2</b>  | <b>36.6 ± 2.0</b> | 39.8 ± 1.4 | 33.1 ± 1.7 | 39.8 |  |
| +Tent-C        | 46.0 ± 0.4        | 45.5 ± 0.4        | 64.9 ± 0.3        | <b>66.1 ± 0.4</b> | 55.6 | <b>43.9 ± 3.3</b>  | 34.5 ± 3.3        | 48.8 ± 1.2 | 32.7 ± 1.7 | 40.0 |  |

Table 9: Full results for Table 2 of resnet50.

| (a) VLCS |                   |                   |                   |                   |      | (b) PACS          |                   |                   |            |      |  |
|----------|-------------------|-------------------|-------------------|-------------------|------|-------------------|-------------------|-------------------|------------|------|--|
|          | C                 | L                 | S                 | V                 | Avg  | A                 | C                 | P                 | S          | Avg  |  |
| ERM      | 97.6 ± 0.1        | 63.4 ± 0.5        | 69.3 ± 1.6        | 72.0 ± 1.5        | 75.5 | 84.8 ± 0.5        | 78.5 ± 0.6        | 96.1 ± 0.2        | 76.2 ± 1.1 | 83.9 |  |
| +T3C     | <b>99.1 ± 0.1</b> | <b>67.2 ± 0.8</b> | <b>73.7 ± 1.7</b> | <b>73.2 ± 1.5</b> | 78.3 | <b>86.0 ± 0.6</b> | <b>80.3 ± 0.9</b> | <b>96.4 ± 0.2</b> | 75.2 ± 1.5 | 84.5 |  |
| +Tent-BN | 87.6 ± 0.9        | 61.7 ± 1.2        | 65.8 ± 1.4        | 64.6 ± 1.7        | 69.9 | <b>84.9 ± 0.4</b> | <b>79.8 ± 0.6</b> | 96.0 ± 0.4        | 75.7 ± 0.7 | 84.1 |  |
| +Tent-C  | 94.1 ± 3.2        | <b>64.8 ± 0.5</b> | 67.0 ± 2.7        | 64.1 ± 2.2        | 72.5 | 73.5 ± 6.3        | 73.7 ± 4.0        | 96.0 ± 0.4        | 75.1 ± 1.6 | 79.6 |  |

  

| (c) OfficeHome |                   |                   |                   |                   |      | (d) TerraIncognita |                   |            |                   |      |  |
|----------------|-------------------|-------------------|-------------------|-------------------|------|--------------------|-------------------|------------|-------------------|------|--|
|                | A                 | C                 | P                 | R                 | Avg  | L100               | L38               | L43        | L46               | Avg  |  |
| ERM            | 58.5 ± 0.4        | 50.7 ± 1.0        | 73.3 ± 0.5        | 75.0 ± 0.2        | 64.4 | 53.4 ± 4.1         | 39.0 ± 1.8        | 52.0 ± 1.0 | 37.1 ± 2.8        | 45.4 |  |
| +T3C           | <b>60.2 ± 0.3</b> | <b>53.4 ± 0.9</b> | <b>76.1 ± 0.4</b> | <b>76.2 ± 0.1</b> | 66.5 | 52.7 ± 2.7         | <b>40.6 ± 2.2</b> | 51.9 ± 1.2 | <b>38.5 ± 2.8</b> | 45.9 |  |
| +Tent-BN       | <b>59.5 ± 0.2</b> | <b>52.5 ± 1.2</b> | 72.3 ± 0.1        | 73.9 ± 0.2        | 64.6 | <b>54.1 ± 2.7</b>  | 38.9 ± 1.9        | 44.6 ± 0.9 | 36.1 ± 1.6        | 43.4 |  |
| +Tent-C        | 57.8 ± 0.6        | 49.1 ± 2.1        | 73.1 ± 0.6        | 74.9 ± 0.3        | 63.7 | 38.1 ± 14.2        | 37.7 ± 2.4        | 51.8 ± 1.3 | 35.3 ± 2.9        | 40.7 |  |

Table 10: Full results for Table 2 of BiT-M-R50x3.

| (a) VLCS |                   |                   |                   |                   |      | (b) PACS          |                   |                   |                   |      |  |
|----------|-------------------|-------------------|-------------------|-------------------|------|-------------------|-------------------|-------------------|-------------------|------|--|
|          | C                 | L                 | S                 | V                 | Avg  | A                 | C                 | P                 | S                 | Avg  |  |
| ERM      | 93.2 ± 0.4        | 66.1 ± 0.3        | 74.0 ± 0.4        | 73.3 ± 1.2        | 76.7 | 82.0 ± 1.7        | 82.3 ± 0.9        | 95.1 ± 0.4        | 78.1 ± 2.1        | 84.4 |  |
| +T3C     | <b>97.5 ± 0.4</b> | <b>67.5 ± 0.9</b> | <b>77.2 ± 0.5</b> | <b>76.5 ± 1.8</b> | 79.7 | <b>83.1 ± 2.0</b> | <b>83.8 ± 0.2</b> | <b>96.4 ± 0.2</b> | <b>78.5 ± 1.4</b> | 85.4 |  |
| +Tent-BN | 89.5 ± 0.8        | 66.1 ± 0.8        | 69.2 ± 0.8        | 69.7 ± 1.2        | 73.6 | <b>83.0 ± 1.4</b> | <b>83.0 ± 0.4</b> | <b>96.3 ± 0.4</b> | <b>79.0 ± 1.2</b> | 85.3 |  |
| +Tent-C  | <b>93.4 ± 0.7</b> | 60.9 ± 4.5        | 60.0 ± 6.7        | 72.2 ± 1.6        | 71.6 | <b>83.3 ± 1.8</b> | 81.4 ± 1.2        | <b>95.2 ± 0.4</b> | 77.8 ± 2.1        | 84.4 |  |

  

| (c) OfficeHome |                   |                   |                   |                   |      | (d) TerraIncognita |                   |                   |            |      |  |
|----------------|-------------------|-------------------|-------------------|-------------------|------|--------------------|-------------------|-------------------|------------|------|--|
|                | A                 | C                 | P                 | R                 | Avg  | L100               | L38               | L43               | L46        | Avg  |  |
| ERM            | 64.3 ± 1.2        | 56.0 ± 0.9        | 78.1 ± 0.8        | 78.3 ± 0.7        | 69.2 | 60.6 ± 1.4         | 43.5 ± 2.9        | 59.0 ± 0.8        | 46.6 ± 2.9 | 52.5 |  |
| +T3C           | <b>65.8 ± 1.2</b> | <b>59.5 ± 1.4</b> | <b>80.9 ± 1.0</b> | <b>80.5 ± 0.8</b> | 71.7 | <b>60.8 ± 0.5</b>  | <b>44.0 ± 1.9</b> | 58.2 ± 0.9        | 45.9 ± 4.1 | 52.2 |  |
| +Tent-BN       | <b>66.6 ± 0.6</b> | <b>58.1 ± 1.4</b> | <b>79.3 ± 1.1</b> | <b>79.0 ± 0.8</b> | 70.8 | 57.3 ± 0.5         | <b>43.9 ± 1.6</b> | 54.1 ± 0.7        | 46.6 ± 2.6 | 50.5 |  |
| +Tent-C        | 63.8 ± 1.4        | 55.3 ± 1.0        | 78.1 ± 0.8        | <b>78.5 ± 0.8</b> | 68.9 | 55.7 ± 4.1         | 40.6 ± 3.7        | <b>59.2 ± 1.0</b> | 46.5 ± 2.7 | 50.5 |  |

Table 11: Full results for Table 2 of BiT-M-R101x3.

| (a) VLCS |                   |                   |                   |                   |      | (b) PACS |                   |                   |                   |                   |      |
|----------|-------------------|-------------------|-------------------|-------------------|------|----------|-------------------|-------------------|-------------------|-------------------|------|
|          | C                 | L                 | S                 | V                 | Avg  |          | A                 | C                 | P                 | S                 | Avg  |
| ERM      | 93.4 ± 1.4        | 62.7 ± 1.4        | 71.3 ± 0.7        | 72.6 ± 1.3        | 75.0 | ERM      | 81.1 ± 0.1        | 83.0 ± 0.8        | 94.0 ± 0.5        | 77.7 ± 1.5        | 84.0 |
| +T3C     | <b>97.6 ± 0.7</b> | <b>65.9 ± 1.5</b> | <b>75.6 ± 0.8</b> | <b>75.4 ± 1.4</b> | 78.6 | +T3C     | <b>81.6 ± 0.1</b> | <b>83.9 ± 0.8</b> | <b>95.2 ± 0.5</b> | <b>80.7 ± 0.9</b> | 85.4 |
| +Tent-BN | 89.0 ± 2.2        | <b>63.1 ± 0.4</b> | 69.3 ± 0.6        | 68.1 ± 0.9        | 72.4 | +Tent-BN | <b>82.7 ± 0.7</b> | <b>84.1 ± 0.4</b> | <b>94.9 ± 0.4</b> | <b>81.2 ± 0.8</b> | 85.7 |
| +Tent-C  | <b>95.5 ± 1.4</b> | 62.5 ± 1.5        | 65.3 ± 1.9        | 71.7 ± 0.5        | 73.8 | +Tent-C  | <b>81.5 ± 0.4</b> | 79.3 ± 1.9        | 88.9 ± 4.1        | 74.4 ± 3.6        | 81.0 |

  

| (c) OfficeHome |                   |                   |                   |                   |      | (d) TerraIncognita |                   |                   |            |                   |      |
|----------------|-------------------|-------------------|-------------------|-------------------|------|--------------------|-------------------|-------------------|------------|-------------------|------|
|                | A                 | C                 | P                 | R                 | Avg  |                    | L100              | L38               | L43        | L46               | Avg  |
| ERM            | 59.7 ± 1.2        | 55.4 ± 1.1        | 78.7 ± 0.2        | 76.9 ± 0.2        | 67.7 | ERM                | 54.5 ± 4.2        | 39.9 ± 2.6        | 56.5 ± 0.7 | 40.5 ± 0.5        | 47.8 |
| +T3C           | <b>61.3 ± 1.2</b> | <b>58.2 ± 1.0</b> | <b>81.2 ± 0.3</b> | <b>78.9 ± 0.2</b> | 69.9 | +T3C               | <b>55.2 ± 3.8</b> | <b>41.3 ± 2.4</b> | 55.8 ± 1.0 | 40.1 ± 1.5        | 48.1 |
| +Tent-BN       | <b>62.1 ± 1.2</b> | <b>57.4 ± 1.1</b> | <b>79.9 ± 0.4</b> | <b>77.6 ± 0.0</b> | 69.2 | +Tent-BN           | 54.1 ± 2.3        | <b>41.2 ± 1.6</b> | 54.6 ± 0.4 | <b>41.4 ± 0.3</b> | 47.8 |
| +Tent-C        | 59.6 ± 1.3        | 54.7 ± 1.1        | 78.7 ± 0.2        | <b>77.0 ± 0.3</b> | 67.5 | +Tent-C            | 49.6 ± 3.9        | 38.2 ± 3.2        | 55.9 ± 0.7 | 40.1 ± 0.6        | 46.0 |

Table 12: Full results for Table 2 of BiT-M-R152x2.

| (a) VLCS |                   |                   |                   |                   |      | (b) PACS |                   |                   |                   |                   |      |
|----------|-------------------|-------------------|-------------------|-------------------|------|----------|-------------------|-------------------|-------------------|-------------------|------|
|          | C                 | L                 | S                 | V                 | Avg  |          | A                 | C                 | P                 | S                 | Avg  |
| ERM      | 95.6 ± 1.0        | 66.0 ± 1.0        | 73.3 ± 1.4        | 71.8 ± 0.7        | 76.7 | ERM      | 80.3 ± 1.4        | 82.2 ± 1.1        | 95.8 ± 0.6        | 82.6 ± 0.2        | 85.2 |
| +T3C     | <b>98.9 ± 0.2</b> | <b>68.2 ± 0.8</b> | <b>76.4 ± 2.2</b> | <b>72.8 ± 0.6</b> | 79.1 | +T3C     | <b>81.9 ± 1.3</b> | <b>83.7 ± 1.1</b> | <b>96.3 ± 0.5</b> | <b>83.6 ± 0.4</b> | 86.4 |
| +Tent-BN | 92.6 ± 1.2        | 64.6 ± 0.1        | 70.3 ± 1.8        | 68.0 ± 0.9        | 73.9 | +Tent-BN | <b>81.6 ± 1.4</b> | <b>82.9 ± 0.8</b> | 95.6 ± 0.5        | <b>82.8 ± 0.4</b> | 85.7 |
| +Tent-C  | 93.3 ± 0.2        | 64.0 ± 0.5        | <b>74.1 ± 1.4</b> | 70.3 ± 2.3        | 75.4 | +Tent-C  | 77.9 ± 1.6        | 68.2 ± 9.7        | 95.1 ± 0.7        | <b>83.2 ± 0.6</b> | 81.1 |

  

| (c) OfficeHome |                   |                   |                   |                   |      | (d) TerraIncognita |            |            |            |                   |      |
|----------------|-------------------|-------------------|-------------------|-------------------|------|--------------------|------------|------------|------------|-------------------|------|
|                | A                 | C                 | P                 | R                 | Avg  |                    | L100       | L38        | L43        | L46               | Avg  |
| ERM            | 63.2 ± 0.7        | 60.2 ± 1.0        | 79.7 ± 0.6        | 82.2 ± 0.3        | 71.3 | ERM                | 57.3 ± 1.4 | 49.3 ± 1.5 | 58.8 ± 0.5 | 40.1 ± 2.5        | 51.4 |
| +T3C           | <b>64.4 ± 0.4</b> | <b>62.8 ± 1.4</b> | <b>82.0 ± 0.7</b> | <b>83.5 ± 0.2</b> | 73.2 | +T3C               | 57.3 ± 0.3 | 48.3 ± 1.7 | 57.7 ± 1.2 | <b>40.2 ± 2.0</b> | 50.9 |
| +Tent-BN       | <b>64.7 ± 0.4</b> | <b>62.1 ± 0.9</b> | <b>80.4 ± 0.5</b> | <b>82.3 ± 0.2</b> | 72.3 | +Tent-BN           | 55.1 ± 0.7 | 47.1 ± 1.9 | 55.4 ± 0.4 | <b>41.2 ± 1.8</b> | 49.7 |
| +Tent-C        | 63.1 ± 0.6        | 59.4 ± 1.2        | 79.7 ± 0.7        | 82.1 ± 0.4        | 71.1 | +Tent-C            | 31.6 ± 9.3 | 48.5 ± 1.3 | 58.2 ± 0.1 | <b>40.7 ± 3.3</b> | 44.8 |

Table 13: Full results for Table 2 of ViT-B16.

| (a) VLCS |                   |                   |                   |                   |      | (b) PACS |                   |                   |                   |                   |      |
|----------|-------------------|-------------------|-------------------|-------------------|------|----------|-------------------|-------------------|-------------------|-------------------|------|
|          | C                 | L                 | S                 | V                 | Avg  |          | A                 | C                 | P                 | S                 | Avg  |
| ERM      | 97.1 ± 0.5        | 65.4 ± 1.2        | 76.6 ± 0.7        | 77.8 ± 0.5        | 79.2 | ERM      | 89.9 ± 0.7        | 86.3 ± 0.4        | 99.2 ± 0.1        | 67.2 ± 0.1        | 85.7 |
| +T3C     | <b>97.7 ± 0.4</b> | <b>66.8 ± 0.8</b> | <b>78.3 ± 0.8</b> | <b>78.0 ± 0.7</b> | 80.2 | +T3C     | <b>90.1 ± 0.7</b> | <b>86.7 ± 0.5</b> | <b>99.3 ± 0.1</b> | <b>67.9 ± 0.3</b> | 86.0 |
| +Tent-BN | 93.1 ± 0.9        | <b>67.3 ± 0.6</b> | 72.6 ± 0.8        | 75.9 ± 0.4        | 77.2 | +Tent-BN | 89.8 ± 0.6        | <b>86.4 ± 0.5</b> | <b>99.3 ± 0.1</b> | <b>69.2 ± 0.9</b> | 86.2 |
| +Tent-C  | <b>98.1 ± 0.4</b> | <b>65.9 ± 0.9</b> | 76.3 ± 0.8        | <b>79.1 ± 0.4</b> | 79.9 | +Tent-C  | <b>90.8 ± 0.8</b> | <b>86.5 ± 0.4</b> | <b>99.3 ± 0.1</b> | 67.1 ± 0.1        | 85.9 |

  

| (c) OfficeHome |                   |                   |                   |                   |      | (d) TerraIncognita |            |                   |            |                   |      |
|----------------|-------------------|-------------------|-------------------|-------------------|------|--------------------|------------|-------------------|------------|-------------------|------|
|                | A                 | C                 | P                 | R                 | Avg  |                    | L100       | L38               | L43        | L46               | Avg  |
| ERM            | 76.5 ± 0.6        | 62.7 ± 0.2        | 86.9 ± 0.1        | 87.6 ± 0.3        | 78.4 | ERM                | 53.1 ± 1.9 | 26.0 ± 1.0        | 50.3 ± 0.6 | 37.9 ± 0.6        | 41.8 |
| +T3C           | <b>77.3 ± 0.8</b> | <b>63.1 ± 0.1</b> | <b>87.3 ± 0.1</b> | <b>87.9 ± 0.3</b> | 78.9 | +T3C               | 52.6 ± 1.9 | <b>28.4 ± 0.7</b> | 49.7 ± 0.9 | <b>39.2 ± 0.8</b> | 42.5 |
| +Tent-BN       | <b>77.1 ± 0.7</b> | <b>63.3 ± 0.1</b> | <b>87.0 ± 0.2</b> | <b>87.7 ± 0.2</b> | 78.8 | +Tent-BN           | 48.0 ± 1.4 | <b>30.6 ± 0.1</b> | 47.6 ± 0.7 | 37.0 ± 0.7        | 40.8 |
| +Tent-C        | 76.3 ± 0.6        | 62.1 ± 0.5        | <b>87.0 ± 0.1</b> | <b>87.7 ± 0.3</b> | 78.3 | +Tent-C            | 52.6 ± 2.1 | <b>26.1 ± 1.2</b> | 50.0 ± 1.2 | 37.4 ± 0.6        | 41.5 |

Table 14: Full results for Table 2 of ViT-L16.

| (a) VLCS |                   |                   |                   |                   |      | (b) PACS |                   |                   |            |                   |      |
|----------|-------------------|-------------------|-------------------|-------------------|------|----------|-------------------|-------------------|------------|-------------------|------|
|          | C                 | L                 | S                 | V                 | Avg  |          | A                 | C                 | P          | S                 | Avg  |
| ERM      | 97.7 ± 0.2        | 62.8 ± 1.9        | 74.1 ± 0.2        | 78.1 ± 1.1        | 78.2 | ERM      | 88.8 ± 0.6        | 83.3 ± 0.5        | 98.6 ± 0.1 | 67.5 ± 2.8        | 84.6 |
| +T3C     | <b>98.4 ± 0.1</b> | <b>63.5 ± 2.1</b> | <b>75.3 ± 0.2</b> | <b>78.8 ± 1.1</b> | 79.0 | +T3C     | <b>89.1 ± 0.6</b> | <b>84.6 ± 0.5</b> | 98.4 ± 0.2 | <b>69.7 ± 2.9</b> | 85.5 |
| +Tent-BN | 94.5 ± 0.3        | <b>65.4 ± 1.3</b> | 69.4 ± 0.2        | 76.0 ± 0.8        | 76.3 | +Tent-BN | <b>89.4 ± 0.6</b> | <b>85.3 ± 0.3</b> | 98.5 ± 0.1 | <b>70.3 ± 2.0</b> | 85.9 |
| +Tent-C  | <b>98.9 ± 0.1</b> | <b>63.3 ± 2.1</b> | 73.9 ± 0.3        | <b>78.2 ± 1.5</b> | 78.6 | +Tent-C  | 88.8 ± 0.8        | 82.4 ± 0.4        | 98.3 ± 0.1 | 67.0 ± 3.1        | 84.1 |

  

| (c) OfficeHome |                   |                   |                   |                   |      | (d) TerraIncognita |                   |                   |                   |                   |      |
|----------------|-------------------|-------------------|-------------------|-------------------|------|--------------------|-------------------|-------------------|-------------------|-------------------|------|
|                | A                 | C                 | P                 | R                 | Avg  |                    | L100              | L38               | L43               | L46               | Avg  |
| ERM            | 77.2 ± 1.2        | 61.6 ± 0.9        | 85.3 ± 1.0        | 87.9 ± 0.4        | 78.0 | ERM                | 56.0 ± 1.3        | 38.9 ± 2.7        | 40.7 ± 8.0        | 35.2 ± 1.6        | 42.7 |
| +T3C           | <b>77.7 ± 1.1</b> | <b>62.7 ± 1.0</b> | <b>86.2 ± 0.8</b> | <b>88.1 ± 0.5</b> | 78.7 | +T3C               | <b>56.5 ± 1.1</b> | <b>40.6 ± 2.8</b> | <b>48.3 ± 0.8</b> | <b>35.9 ± 2.5</b> | 45.3 |
| +Tent-BN       | <b>77.5 ± 0.9</b> | <b>62.6 ± 0.8</b> | <b>85.7 ± 0.9</b> | <b>88.0 ± 0.4</b> | 78.5 | +Tent-BN           | 49.8 ± 0.8        | <b>39.3 ± 2.4</b> | <b>46.4 ± 0.8</b> | 35.1 ± 2.1        | 42.6 |
| +Tent-C        | 75.6 ± 0.3        | 61.3 ± 0.9        | 85.2 ± 0.9        | 87.9 ± 0.4        | 77.5 | +Tent-C            | <b>61.6 ± 0.4</b> | 38.5 ± 2.7        | <b>49.3 ± 0.5</b> | <b>35.5 ± 1.7</b> | 46.2 |

Table 15: Full results for Table 2 of DeiT.

| (a) VLCS |                   |                   |                   |                   |      | (b) PACS |                   |                   |                   |                   |      |
|----------|-------------------|-------------------|-------------------|-------------------|------|----------|-------------------|-------------------|-------------------|-------------------|------|
|          | C                 | L                 | S                 | V                 | Avg  |          | A                 | C                 | P                 | S                 | Avg  |
| ERM      | 97.3 ± 0.4        | 64.0 ± 0.6        | 76.9 ± 0.6        | 78.9 ± 0.8        | 79.3 | ERM      | 92.8 ± 0.5        | 83.8 ± 0.5        | 98.5 ± 0.1        | 76.2 ± 1.4        | 87.8 |
| +T3C     | <b>98.6 ± 0.2</b> | <b>66.1 ± 0.6</b> | <b>79.8 ± 0.5</b> | <b>80.8 ± 0.4</b> | 81.3 | +T3C     | <b>93.4 ± 0.3</b> | <b>85.9 ± 0.4</b> | <b>98.8 ± 0.1</b> | <b>80.0 ± 1.1</b> | 89.5 |
| +Tent-BN | 91.5 ± 0.5        | <b>66.4 ± 0.8</b> | 73.0 ± 0.5        | 76.5 ± 0.6        | 76.9 | +Tent-BN | 92.5 ± 0.5        | <b>84.9 ± 0.4</b> | <b>99.0 ± 0.1</b> | <b>81.5 ± 0.9</b> | 89.5 |
| +Tent-C  | <b>99.4 ± 0.1</b> | 63.7 ± 1.4        | <b>78.1 ± 1.6</b> | <b>79.3 ± 1.0</b> | 80.1 | +Tent-C  | <b>94.3 ± 0.4</b> | 83.7 ± 0.7        | <b>98.7 ± 0.1</b> | <b>77.1 ± 2.1</b> | 88.4 |

  

| (c) OfficeHome |                   |                   |                   |                   |      | (d) TerraIncognita |                   |            |            |            |      |
|----------------|-------------------|-------------------|-------------------|-------------------|------|--------------------|-------------------|------------|------------|------------|------|
|                | A                 | C                 | P                 | R                 | Avg  |                    | L100              | L38        | L43        | L46        | Avg  |
| ERM            | 74.5 ± 0.2        | 63.3 ± 0.6        | 83.2 ± 0.2        | 85.5 ± 0.2        | 76.6 | ERM                | 57.5 ± 2.9        | 44.0 ± 2.0 | 56.0 ± 0.4 | 42.3 ± 0.8 | 50.0 |
| +T3C           | <b>76.1 ± 0.2</b> | <b>65.6 ± 0.6</b> | <b>85.0 ± 0.2</b> | <b>86.5 ± 0.1</b> | 78.3 | +T3C               | <b>59.8 ± 1.9</b> | 43.8 ± 1.4 | 54.8 ± 0.4 | 42.1 ± 1.4 | 50.1 |
| +Tent-BN       | <b>74.8 ± 0.4</b> | <b>64.3 ± 0.5</b> | <b>83.7 ± 0.1</b> | <b>85.7 ± 0.3</b> | 77.1 | +Tent-BN           | 52.0 ± 2.1        | 41.7 ± 1.2 | 52.3 ± 0.8 | 41.4 ± 1.1 | 46.9 |
| +Tent-C        | 73.5 ± 0.4        | <b>63.4 ± 0.7</b> | 83.2 ± 0.2        | <b>85.6 ± 0.3</b> | 76.4 | +Tent-C            | <b>59.1 ± 1.6</b> | 43.5 ± 2.0 | 55.8 ± 0.4 | 41.7 ± 0.8 | 50.0 |

Table 16: Full results for Table 2 of HViT.

| (a) VLCS |                   |                   |                   |                   |      | (b) PACS |                   |                   |                   |                   |      |
|----------|-------------------|-------------------|-------------------|-------------------|------|----------|-------------------|-------------------|-------------------|-------------------|------|
|          | C                 | L                 | S                 | V                 | Avg  |          | A                 | C                 | P                 | S                 | Avg  |
| ERM      | 96.8 ± 0.5        | 64.1 ± 0.9        | 75.9 ± 1.1        | 80.0 ± 1.2        | 79.2 | ERM      | 89.5 ± 1.4        | 85.9 ± 2.6        | 98.0 ± 0.5        | 85.5 ± 1.1        | 89.7 |
| +T3C     | <b>97.6 ± 0.5</b> | <b>66.8 ± 1.1</b> | <b>78.4 ± 1.6</b> | <b>81.4 ± 1.2</b> | 81.0 | +T3C     | <b>90.1 ± 1.3</b> | <b>87.3 ± 1.9</b> | <b>98.4 ± 0.3</b> | <b>85.9 ± 1.3</b> | 90.4 |
| +Tent-BN | 92.2 ± 0.1        | <b>66.1 ± 0.8</b> | 73.0 ± 1.2        | 77.8 ± 0.7        | 77.3 | +Tent-BN | <b>89.8 ± 1.2</b> | <b>87.5 ± 1.4</b> | <b>98.4 ± 0.4</b> | <b>86.2 ± 0.8</b> | 90.5 |
| +Tent-C  | <b>98.4 ± 0.7</b> | 60.7 ± 4.8        | 75.3 ± 0.9        | <b>80.8 ± 1.6</b> | 78.8 | +Tent-C  | <b>90.0 ± 0.7</b> | 83.2 ± 4.0        | <b>98.4 ± 0.3</b> | <b>85.8 ± 1.3</b> | 89.3 |

  

| (c) OfficeHome |                   |                   |                   |                   |      | (d) TerraIncognita |                   |                   |                   |                   |      |
|----------------|-------------------|-------------------|-------------------|-------------------|------|--------------------|-------------------|-------------------|-------------------|-------------------|------|
|                | A                 | C                 | P                 | R                 | Avg  |                    | L100              | L38               | L43               | L46               | Avg  |
| ERM            | 77.3 ± 1.2        | 68.4 ± 0.6        | 87.0 ± 0.2        | 87.5 ± 0.3        | 80.0 | ERM                | 62.3 ± 2.2        | 44.6 ± 0.5        | 56.6 ± 0.6        | 41.9 ± 1.0        | 51.4 |
| +T3C           | <b>78.0 ± 1.1</b> | <b>69.0 ± 0.5</b> | <b>87.2 ± 0.2</b> | <b>87.9 ± 0.3</b> | 80.5 | +T3C               | <b>62.6 ± 2.5</b> | <b>46.4 ± 0.4</b> | <b>57.2 ± 0.7</b> | <b>43.1 ± 0.8</b> | 52.3 |
| +Tent-BN       | <b>77.9 ± 1.1</b> | <b>68.7 ± 0.4</b> | <b>87.1 ± 0.1</b> | <b>87.7 ± 0.2</b> | 80.3 | +Tent-BN           | 58.5 ± 1.8        | <b>45.3 ± 0.5</b> | 55.1 ± 0.9        | <b>42.7 ± 0.4</b> | 50.4 |
| +Tent-C        | 77.3 ± 1.2        | 68.1 ± 0.5        | 86.8 ± 0.2        | 87.5 ± 0.2        | 79.9 | +Tent-C            | 62.0 ± 2.1        | 44.2 ± 0.4        | 55.2 ± 1.1        | <b>42.0 ± 1.0</b> | 50.8 |

Table 17: Full results for Table 2 of Mixer-L16.

| (a) VLCS |                   |                   |                   |                   |      | (b) PACS |                   |                   |                   |                   |      |
|----------|-------------------|-------------------|-------------------|-------------------|------|----------|-------------------|-------------------|-------------------|-------------------|------|
|          | C                 | L                 | S                 | V                 | Avg  |          | A                 | C                 | P                 | S                 | Avg  |
| ERM      | 98.8 ± 0.2        | 61.0 ± 0.4        | 72.5 ± 0.9        | 73.5 ± 0.3        | 76.4 | ERM      | 79.9 ± 3.2        | 80.3 ± 0.8        | 97.6 ± 0.4        | 67.5 ± 0.3        | 81.3 |
| +T3C     | <b>99.7 ± 0.1</b> | <b>65.8 ± 0.4</b> | <b>77.3 ± 1.4</b> | <b>78.3 ± 1.2</b> | 80.3 | +T3C     | <b>81.8 ± 3.1</b> | <b>82.3 ± 0.5</b> | <b>98.7 ± 0.3</b> | <b>69.3 ± 0.7</b> | 83.0 |
| +Tent-BN | 92.6 ± 0.5        | 59.9 ± 1.9        | 67.7 ± 1.3        | 71.1 ± 1.0        | 72.8 | +Tent-BN | <b>81.7 ± 3.2</b> | <b>81.6 ± 0.6</b> | 97.5 ± 0.4        | 67.5 ± 0.7        | 82.1 |
| +Tent-C  | <b>99.2 ± 0.3</b> | 57.2 ± 3.0        | 71.3 ± 0.4        | <b>73.7 ± 1.7</b> | 75.3 | +Tent-C  | <b>80.5 ± 2.9</b> | 77.4 ± 1.4        | <b>97.7 ± 0.4</b> | 65.7 ± 1.3        | 80.3 |

  

| (c) OfficeHome |                   |                   |                   |                   |      | (d) TerraIncognita |                   |                   |                   |            |      |
|----------------|-------------------|-------------------|-------------------|-------------------|------|--------------------|-------------------|-------------------|-------------------|------------|------|
|                | A                 | C                 | P                 | R                 | Avg  |                    | L100              | L38               | L43               | L46        | Avg  |
| ERM            | 69.9 ± 2.4        | 51.3 ± 6.4        | 81.7 ± 1.6        | 74.9 ± 4.5        | 69.4 | ERM                | 43.5 ± 1.6        | 24.9 ± 2.0        | 45.2 ± 0.2        | 34.6 ± 1.0 | 37.1 |
| +T3C           | <b>72.4 ± 2.0</b> | <b>54.9 ± 7.0</b> | <b>84.3 ± 1.6</b> | <b>77.4 ± 4.4</b> | 72.3 | +T3C               | <b>44.6 ± 1.5</b> | <b>30.1 ± 1.1</b> | 42.6 ± 0.6        | 32.8 ± 1.1 | 37.5 |
| +Tent-BN       | <b>71.4 ± 2.1</b> | <b>53.1 ± 6.7</b> | <b>82.2 ± 1.5</b> | <b>75.4 ± 4.4</b> | 70.5 | +Tent-BN           | 39.7 ± 1.4        | <b>31.6 ± 1.1</b> | 40.4 ± 0.2        | 33.2 ± 0.4 | 36.2 |
| +Tent-C        | <b>70.1 ± 2.3</b> | 51.3 ± 6.4        | <b>81.9 ± 1.6</b> | 74.2 ± 4.7        | 69.4 | +Tent-C            | <b>45.4 ± 2.4</b> | 24.0 ± 2.2        | <b>45.4 ± 0.1</b> | 34.3 ± 0.9 | 37.3 |

### B.3 Full Results for Figure 1-a

#### B.3.1 Fine-tuning performance

Table 18: Full results for fine-tuning resnet18.  
(a) VLCS (b) PACS

|       | C                 | L                 | S                 | V                 | Avg  |       | A                 | C                 | P                 | S                 | Avg  |
|-------|-------------------|-------------------|-------------------|-------------------|------|-------|-------------------|-------------------|-------------------|-------------------|------|
| ERM   | 95.8 ± 0.4        | 60.4 ± 1.1        | 66.4 ± 0.8        | 70.2 ± 1.5        | 73.2 | ERM   | 78.7 ± 1.3        | 74.3 ± 0.6        | 92.4 ± 0.2        | 75.6 ± 0.8        | 80.3 |
| +head | <b>99.3 ± 0.2</b> | <b>70.2 ± 0.9</b> | <b>76.6 ± 0.3</b> | <b>77.9 ± 0.9</b> | 81.0 | +head | <b>86.8 ± 0.3</b> | <b>84.7 ± 0.1</b> | <b>95.6 ± 0.1</b> | <b>86.0 ± 0.3</b> | 88.3 |
| +body | <b>99.7 ± 0.0</b> | <b>72.5 ± 0.8</b> | <b>77.8 ± 0.4</b> | <b>81.3 ± 0.3</b> | 82.8 | +body | <b>90.2 ± 0.3</b> | <b>89.7 ± 0.3</b> | <b>96.2 ± 0.1</b> | <b>91.7 ± 0.1</b> | 91.9 |
| +all  | <b>99.7 ± 0.0</b> | <b>72.4 ± 0.8</b> | <b>77.8 ± 0.3</b> | <b>81.4 ± 0.2</b> | 82.8 | +all  | <b>90.3 ± 0.4</b> | <b>89.7 ± 0.1</b> | <b>96.2 ± 0.2</b> | <b>91.6 ± 0.0</b> | 91.9 |

  

|       | A                 | C                 | P                 | R                 | Avg  |       | L100              | L38               | L43               | L46               | Avg  |
|-------|-------------------|-------------------|-------------------|-------------------|------|-------|-------------------|-------------------|-------------------|-------------------|------|
| ERM   | 46.1 ± 0.4        | 45.8 ± 0.3        | 65.0 ± 0.3        | 66.0 ± 0.3        | 55.7 | ERM   | 41.6 ± 3.1        | 36.0 ± 3.0        | 51.0 ± 0.2        | 33.9 ± 1.0        | 40.7 |
| +head | 46.1 ± 0.8        | <b>55.9 ± 0.1</b> | <b>74.5 ± 0.1</b> | 65.5 ± 0.7        | 60.5 | +head | <b>80.6 ± 0.2</b> | <b>75.3 ± 0.3</b> | <b>67.9 ± 0.1</b> | <b>61.5 ± 1.5</b> | 71.3 |
| +body | <b>55.1 ± 0.5</b> | <b>66.2 ± 0.3</b> | <b>78.4 ± 0.3</b> | <b>72.0 ± 0.2</b> | 67.9 | +body | <b>89.6 ± 0.4</b> | <b>86.7 ± 0.5</b> | <b>80.6 ± 0.3</b> | <b>78.5 ± 0.2</b> | 83.9 |
| +all  | <b>55.0 ± 0.4</b> | <b>66.3 ± 0.3</b> | <b>78.7 ± 0.4</b> | <b>71.8 ± 0.3</b> | 68.0 | +all  | <b>89.7 ± 0.3</b> | <b>86.5 ± 0.1</b> | <b>80.9 ± 0.1</b> | <b>78.3 ± 0.6</b> | 83.9 |

Table 19: Full results for fine-tuning resnet50.  
(a) VLCS (b) PACS

|       | C                 | L                 | S                 | V                 | Avg  |       | A                 | C                 | P                 | S                 | Avg  |
|-------|-------------------|-------------------|-------------------|-------------------|------|-------|-------------------|-------------------|-------------------|-------------------|------|
| ERM   | 97.6 ± 0.1        | 63.4 ± 0.5        | 69.3 ± 1.6        | 72.0 ± 1.5        | 75.5 | ERM   | 84.8 ± 0.5        | 78.5 ± 0.6        | 96.1 ± 0.2        | 76.2 ± 1.1        | 83.9 |
| +head | <b>99.1 ± 0.1</b> | <b>71.9 ± 0.2</b> | <b>78.1 ± 0.3</b> | <b>82.5 ± 0.8</b> | 82.9 | +head | <b>89.8 ± 0.1</b> | <b>88.6 ± 0.8</b> | <b>96.4 ± 0.1</b> | <b>84.6 ± 0.3</b> | 89.8 |
| +body | <b>99.9 ± 0.1</b> | <b>73.7 ± 0.7</b> | <b>80.4 ± 0.7</b> | <b>85.1 ± 0.5</b> | 84.8 | +body | <b>93.3 ± 0.3</b> | <b>93.0 ± 0.5</b> | <b>97.5 ± 0.1</b> | <b>93.2 ± 0.2</b> | 94.2 |
| +all  | <b>99.7 ± 0.1</b> | <b>73.6 ± 0.5</b> | <b>80.5 ± 0.6</b> | <b>85.1 ± 0.5</b> | 84.7 | +all  | <b>93.5 ± 0.1</b> | <b>93.1 ± 0.5</b> | <b>97.4 ± 0.0</b> | <b>93.0 ± 0.1</b> | 94.2 |

  

|       | A                 | C                 | P                 | R                 | Avg  |       | L100              | L38               | L43               | L46               | Avg  |
|-------|-------------------|-------------------|-------------------|-------------------|------|-------|-------------------|-------------------|-------------------|-------------------|------|
| ERM   | 58.5 ± 0.4        | 50.7 ± 1.0        | 73.3 ± 0.5        | 75.0 ± 0.2        | 64.4 | ERM   | 53.4 ± 4.1        | 39.0 ± 1.8        | 52.0 ± 1.0        | 37.1 ± 2.8        | 45.4 |
| +head | 58.1 ± 0.5        | <b>62.1 ± 0.6</b> | <b>79.6 ± 0.3</b> | 73.8 ± 0.7        | 68.4 | +head | <b>81.4 ± 0.7</b> | <b>75.4 ± 1.0</b> | <b>67.4 ± 2.1</b> | <b>61.4 ± 1.4</b> | 71.4 |
| +body | <b>67.5 ± 0.8</b> | <b>71.7 ± 0.3</b> | <b>84.7 ± 0.3</b> | <b>79.6 ± 0.1</b> | 75.9 | +body | <b>91.0 ± 0.2</b> | <b>87.2 ± 0.2</b> | <b>80.8 ± 0.6</b> | <b>80.0 ± 0.6</b> | 84.7 |
| +all  | <b>67.1 ± 0.8</b> | <b>72.5 ± 0.3</b> | <b>84.5 ± 0.3</b> | <b>79.8 ± 0.3</b> | 76.0 | +all  | <b>90.2 ± 0.3</b> | <b>85.5 ± 1.5</b> | <b>81.5 ± 0.3</b> | <b>79.9 ± 0.1</b> | 84.3 |

Table 20: Full results for fine-tuning BiT-M-R50x3.  
(a) VLCS (b) PACS

|       | C                 | L                 | S                 | V                 | Avg  |       | A                 | C                 | P                 | S                 | Avg  |
|-------|-------------------|-------------------|-------------------|-------------------|------|-------|-------------------|-------------------|-------------------|-------------------|------|
| ERM   | 93.2 ± 0.4        | 66.1 ± 0.3        | 74.0 ± 0.4        | 73.3 ± 1.2        | 76.7 | ERM   | 82.0 ± 1.7        | 82.3 ± 0.9        | 95.1 ± 0.4        | 78.1 ± 2.1        | 84.4 |
| +head | <b>98.8 ± 0.3</b> | <b>73.3 ± 1.2</b> | <b>81.0 ± 0.1</b> | <b>83.1 ± 0.9</b> | 84.1 | +head | <b>90.1 ± 0.7</b> | <b>90.5 ± 0.7</b> | <b>97.2 ± 0.2</b> | <b>88.5 ± 0.5</b> | 91.6 |
| +body | <b>99.1 ± 0.2</b> | <b>74.3 ± 0.8</b> | <b>79.7 ± 0.8</b> | <b>83.9 ± 0.6</b> | 84.2 | +body | <b>92.0 ± 0.3</b> | <b>94.2 ± 0.7</b> | <b>96.7 ± 0.1</b> | <b>92.9 ± 0.5</b> | 94.0 |
| +all  | <b>99.3 ± 0.2</b> | <b>75.4 ± 0.3</b> | <b>80.5 ± 0.2</b> | <b>84.6 ± 0.4</b> | 84.9 | +all  | <b>92.5 ± 1.0</b> | <b>93.8 ± 0.3</b> | <b>96.0 ± 0.5</b> | <b>93.0 ± 0.2</b> | 93.8 |

  

|       | A                 | C                 | P                 | R                 | Avg  |       | L100              | L38               | L43               | L46               | Avg  |
|-------|-------------------|-------------------|-------------------|-------------------|------|-------|-------------------|-------------------|-------------------|-------------------|------|
| ERM   | 64.3 ± 1.2        | 56.0 ± 0.9        | 78.1 ± 0.8        | 78.3 ± 0.7        | 69.2 | ERM   | 60.6 ± 1.4        | 43.5 ± 2.9        | 59.0 ± 0.8        | 46.6 ± 2.9        | 52.5 |
| +head | <b>66.9 ± 0.4</b> | <b>68.8 ± 0.7</b> | 68.3 ± 15.2       | <b>80.9 ± 0.4</b> | 71.2 | +head | <b>86.1 ± 0.5</b> | <b>79.9 ± 1.3</b> | <b>74.6 ± 0.2</b> | <b>72.9 ± 0.7</b> | 78.4 |
| +body | <b>68.9 ± 2.7</b> | <b>72.0 ± 0.6</b> | <b>86.6 ± 0.7</b> | <b>81.5 ± 0.6</b> | 77.3 | +body | <b>91.2 ± 0.4</b> | <b>88.6 ± 0.3</b> | <b>84.0 ± 0.2</b> | <b>81.4 ± 0.2</b> | 86.3 |
| +all  | <b>66.7 ± 1.5</b> | <b>73.8 ± 0.7</b> | <b>85.4 ± 0.7</b> | <b>82.1 ± 0.2</b> | 77.0 | +all  | <b>91.7 ± 0.0</b> | <b>89.0 ± 0.4</b> | <b>83.9 ± 0.6</b> | <b>82.6 ± 0.8</b> | 86.8 |

Table 21: Full results for fine-tuning BiT-M-R101x3.

| (a) VLCS |                   |                   |                   |                   |      | (b) PACS |                   |                   |                   |                   |      |
|----------|-------------------|-------------------|-------------------|-------------------|------|----------|-------------------|-------------------|-------------------|-------------------|------|
|          | C                 | L                 | S                 | V                 | Avg  |          | A                 | C                 | P                 | S                 | Avg  |
| ERM      | 93.4 ± 1.4        | 62.7 ± 1.4        | 71.3 ± 0.7        | 72.6 ± 1.3        | 75.0 | ERM      | 81.1 ± 0.1        | 83.0 ± 0.8        | 94.0 ± 0.5        | 77.7 ± 1.5        | 84.0 |
| +head    | <b>98.5 ± 0.6</b> | <b>73.8 ± 1.4</b> | <b>79.3 ± 0.9</b> | <b>80.2 ± 1.7</b> | 82.9 | +head    | <b>88.9 ± 0.8</b> | <b>90.8 ± 0.2</b> | <b>95.8 ± 0.5</b> | <b>89.8 ± 0.7</b> | 91.3 |
| +body    | <b>98.9 ± 0.3</b> | <b>72.3 ± 0.3</b> | <b>80.6 ± 0.4</b> | <b>80.8 ± 0.3</b> | 83.2 | +body    | <b>91.3 ± 0.6</b> | <b>93.6 ± 0.1</b> | <b>96.2 ± 0.2</b> | <b>93.0 ± 0.5</b> | 93.5 |
| +all     | <b>99.0 ± 0.1</b> | <b>73.6 ± 0.5</b> | <b>79.6 ± 1.0</b> | <b>79.7 ± 1.2</b> | 82.9 | +all     | <b>89.2 ± 1.8</b> | <b>93.8 ± 0.2</b> | <b>95.0 ± 0.6</b> | <b>93.1 ± 0.4</b> | 92.8 |

  

| (c) OfficeHome |                   |                   |                   |                   |      | (d) TerraIncognita |                   |                   |                   |                   |      |
|----------------|-------------------|-------------------|-------------------|-------------------|------|--------------------|-------------------|-------------------|-------------------|-------------------|------|
|                | A                 | C                 | P                 | R                 | Avg  |                    | L100              | L38               | L43               | L46               | Avg  |
| ERM            | 59.7 ± 1.2        | 55.4 ± 1.1        | 78.7 ± 0.2        | 76.9 ± 0.2        | 67.7 | ERM                | 54.5 ± 4.2        | 39.9 ± 2.6        | 56.5 ± 0.7        | 40.5 ± 0.5        | 47.8 |
| +head          | <b>63.0 ± 0.7</b> | <b>67.0 ± 1.3</b> | <b>85.4 ± 0.7</b> | <b>79.8 ± 0.4</b> | 73.8 | +head              | <b>84.8 ± 0.8</b> | <b>77.4 ± 0.8</b> | <b>71.5 ± 0.3</b> | <b>69.9 ± 0.8</b> | 75.9 |
| +body          | <b>67.9 ± 0.4</b> | <b>70.0 ± 1.2</b> | <b>82.3 ± 0.6</b> | <b>78.7 ± 1.0</b> | 74.7 | +body              | <b>90.9 ± 0.3</b> | <b>88.5 ± 0.2</b> | <b>82.8 ± 0.5</b> | <b>81.9 ± 0.2</b> | 86.0 |
| +all           | <b>67.2 ± 0.5</b> | <b>72.6 ± 1.1</b> | <b>85.2 ± 1.0</b> | <b>77.7 ± 2.0</b> | 75.7 | +all               | <b>91.6 ± 0.1</b> | <b>88.6 ± 0.2</b> | <b>84.5 ± 0.2</b> | <b>82.0 ± 0.5</b> | 86.7 |

Table 22: Full results for fine-tuning BiT-M-R152x2.

| (a) VLCS |                   |                   |                   |                   |      | (b) PACS |                   |                   |                   |                   |      |
|----------|-------------------|-------------------|-------------------|-------------------|------|----------|-------------------|-------------------|-------------------|-------------------|------|
|          | C                 | L                 | S                 | V                 | Avg  |          | A                 | C                 | P                 | S                 | Avg  |
| ERM      | 95.6 ± 1.0        | 66.0 ± 1.0        | 73.3 ± 1.4        | 71.8 ± 0.7        | 76.7 | ERM      | 80.3 ± 1.4        | 82.2 ± 1.1        | 95.8 ± 0.6        | 82.6 ± 0.2        | 85.2 |
| +head    | <b>99.0 ± 0.2</b> | <b>74.2 ± 0.5</b> | <b>80.2 ± 0.4</b> | <b>80.9 ± 1.0</b> | 83.6 | +head    | <b>89.4 ± 1.3</b> | <b>89.7 ± 0.5</b> | <b>96.7 ± 0.2</b> | <b>90.7 ± 0.4</b> | 91.6 |
| +body    | <b>99.6 ± 0.0</b> | <b>74.9 ± 0.6</b> | <b>81.0 ± 0.3</b> | <b>83.8 ± 0.3</b> | 84.8 | +body    | <b>92.5 ± 0.1</b> | <b>95.5 ± 0.2</b> | <b>97.2 ± 0.2</b> | <b>93.1 ± 0.5</b> | 94.6 |
| +all     | <b>99.5 ± 0.1</b> | <b>74.6 ± 0.3</b> | <b>81.3 ± 0.2</b> | <b>82.7 ± 1.1</b> | 84.5 | +all     | <b>92.0 ± 0.0</b> | <b>95.2 ± 0.4</b> | <b>97.1 ± 0.2</b> | <b>93.1 ± 0.6</b> | 94.4 |

  

| (c) OfficeHome |                   |                   |                   |                   |      | (d) TerraIncognita |                   |                   |                   |                   |      |
|----------------|-------------------|-------------------|-------------------|-------------------|------|--------------------|-------------------|-------------------|-------------------|-------------------|------|
|                | A                 | C                 | P                 | R                 | Avg  |                    | L100              | L38               | L43               | L46               | Avg  |
| ERM            | 63.2 ± 0.7        | 60.2 ± 1.0        | 79.7 ± 0.6        | 82.2 ± 0.3        | 71.3 | ERM                | 57.3 ± 1.4        | 49.3 ± 1.5        | 58.8 ± 0.5        | 40.1 ± 2.5        | 51.4 |
| +head          | <b>66.8 ± 2.0</b> | <b>71.6 ± 0.7</b> | <b>86.6 ± 0.5</b> | <b>83.7 ± 0.6</b> | 77.2 | +head              | <b>85.7 ± 0.3</b> | <b>78.9 ± 0.7</b> | <b>74.2 ± 1.2</b> | <b>69.2 ± 1.0</b> | 77.0 |
| +body          | <b>72.6 ± 0.7</b> | <b>74.1 ± 1.7</b> | <b>87.9 ± 0.6</b> | <b>83.8 ± 0.2</b> | 79.6 | +body              | <b>91.3 ± 0.1</b> | <b>89.1 ± 0.5</b> | <b>83.2 ± 0.1</b> | <b>82.4 ± 0.2</b> | 86.5 |
| +all           | <b>72.3 ± 0.6</b> | <b>75.4 ± 1.1</b> | <b>86.6 ± 1.2</b> | <b>82.8 ± 0.3</b> | 79.3 | +all               | <b>91.2 ± 0.0</b> | <b>88.6 ± 0.3</b> | <b>82.8 ± 0.3</b> | <b>81.8 ± 0.2</b> | 86.1 |

Table 23: Full results for fine-tuning ViT-B16.

| (a) VLCS |                   |                   |                   |                   |      | (b) PACS |                   |                   |                   |                   |      |
|----------|-------------------|-------------------|-------------------|-------------------|------|----------|-------------------|-------------------|-------------------|-------------------|------|
|          | C                 | L                 | S                 | V                 | Avg  |          | A                 | C                 | P                 | S                 | Avg  |
| ERM      | 97.1 ± 0.5        | 65.4 ± 1.2        | 76.6 ± 0.7        | 77.8 ± 0.5        | 79.2 | ERM      | 89.9 ± 0.7        | 86.3 ± 0.4        | 99.2 ± 0.1        | 67.2 ± 0.1        | 85.7 |
| +head    | <b>99.2 ± 0.2</b> | <b>76.1 ± 0.4</b> | <b>84.3 ± 0.3</b> | <b>86.7 ± 0.2</b> | 86.6 | +head    | <b>93.3 ± 0.5</b> | <b>92.0 ± 0.4</b> | <b>99.2 ± 0.1</b> | <b>80.2 ± 0.5</b> | 91.2 |
| +body    | <b>99.9 ± 0.1</b> | <b>78.0 ± 0.5</b> | <b>84.1 ± 0.2</b> | <b>87.6 ± 0.4</b> | 87.4 | +body    | <b>95.2 ± 0.2</b> | <b>95.3 ± 0.2</b> | <b>99.3 ± 0.2</b> | <b>88.8 ± 0.5</b> | 94.7 |
| +all     | <b>99.9 ± 0.1</b> | <b>79.0 ± 0.0</b> | <b>84.2 ± 0.2</b> | <b>87.4 ± 0.3</b> | 87.6 | +all     | <b>95.2 ± 0.3</b> | <b>95.3 ± 0.2</b> | <b>99.3 ± 0.2</b> | <b>88.7 ± 0.3</b> | 94.6 |

  

| (c) OfficeHome |                   |                   |                   |                   |      | (d) TerraIncognita |                   |                   |                   |                   |      |
|----------------|-------------------|-------------------|-------------------|-------------------|------|--------------------|-------------------|-------------------|-------------------|-------------------|------|
|                | A                 | C                 | P                 | R                 | Avg  |                    | L100              | L38               | L43               | L46               | Avg  |
| ERM            | 76.5 ± 0.6        | 62.7 ± 0.2        | 86.9 ± 0.1        | 87.6 ± 0.3        | 78.4 | ERM                | 53.1 ± 1.9        | 26.0 ± 1.0        | 50.3 ± 0.6        | 37.9 ± 0.6        | 41.8 |
| +head          | <b>78.9 ± 0.3</b> | <b>69.3 ± 0.5</b> | <b>89.6 ± 0.1</b> | <b>88.3 ± 0.6</b> | 81.5 | +head              | <b>84.7 ± 0.1</b> | <b>79.2 ± 0.2</b> | <b>73.6 ± 0.2</b> | <b>70.3 ± 0.4</b> | 76.9 |
| +body          | <b>82.0 ± 0.2</b> | <b>77.4 ± 0.2</b> | <b>92.2 ± 0.2</b> | <b>89.9 ± 0.3</b> | 85.4 | +body              | <b>89.6 ± 0.4</b> | <b>87.2 ± 0.4</b> | <b>81.4 ± 0.0</b> | <b>79.7 ± 0.7</b> | 84.5 |
| +all           | <b>82.4 ± 0.2</b> | <b>77.6 ± 0.2</b> | <b>92.1 ± 0.3</b> | <b>89.9 ± 0.3</b> | 85.5 | +all               | <b>90.2 ± 0.1</b> | <b>87.2 ± 0.3</b> | <b>81.5 ± 0.2</b> | <b>79.9 ± 0.4</b> | 84.7 |

Table 24: Full results for fine-tuning ViT-L16.

| (a) VLCS |                   |                   |                   |                   |      | (b) PACS |                   |                   |                   |                   |      |
|----------|-------------------|-------------------|-------------------|-------------------|------|----------|-------------------|-------------------|-------------------|-------------------|------|
|          | C                 | L                 | S                 | V                 | Avg  |          | A                 | C                 | P                 | S                 | Avg  |
| ERM      | 97.7 ± 0.2        | 62.8 ± 1.9        | 74.1 ± 0.2        | 78.1 ± 1.1        | 78.2 | ERM      | 88.8 ± 0.6        | 83.3 ± 0.5        | 98.6 ± 0.1        | 67.5 ± 2.8        | 84.6 |
| +head    | <b>99.3 ± 0.1</b> | <b>77.1 ± 0.4</b> | <b>82.4 ± 0.7</b> | <b>86.4 ± 0.2</b> | 86.3 | +head    | <b>93.0 ± 0.3</b> | <b>93.2 ± 0.3</b> | <b>98.7 ± 0.2</b> | <b>83.2 ± 0.4</b> | 92.0 |
| +body    | <b>99.8 ± 0.1</b> | <b>76.7 ± 0.1</b> | <b>82.8 ± 0.3</b> | <b>87.4 ± 0.3</b> | 86.7 | +body    | <b>94.8 ± 0.4</b> | <b>95.8 ± 0.1</b> | <b>98.9 ± 0.2</b> | <b>90.5 ± 0.6</b> | 95.0 |
| +all     | <b>99.7 ± 0.2</b> | <b>76.4 ± 0.2</b> | <b>82.7 ± 0.3</b> | <b>87.1 ± 0.3</b> | 86.5 | +all     | <b>94.7 ± 0.4</b> | <b>96.3 ± 0.2</b> | <b>98.9 ± 0.2</b> | <b>90.3 ± 1.0</b> | 95.1 |

  

| (c) OfficeHome |                   |                   |                   |                   |      | (d) TerraIncognita |                   |                   |                   |                   |      |
|----------------|-------------------|-------------------|-------------------|-------------------|------|--------------------|-------------------|-------------------|-------------------|-------------------|------|
|                | A                 | C                 | P                 | R                 | Avg  |                    | L100              | L38               | L43               | L46               | Avg  |
| ERM            | 77.2 ± 1.2        | 61.6 ± 0.9        | 85.3 ± 1.0        | 87.9 ± 0.4        | 78.0 | ERM                | 56.0 ± 1.3        | 38.9 ± 2.7        | 40.7 ± 8.0        | 35.2 ± 1.6        | 42.7 |
| +head          | <b>79.1 ± 1.0</b> | <b>70.8 ± 0.9</b> | <b>89.6 ± 0.8</b> | <b>88.9 ± 0.3</b> | 82.1 | +head              | <b>86.2 ± 0.9</b> | <b>79.8 ± 0.7</b> | <b>75.8 ± 0.4</b> | <b>70.9 ± 0.7</b> | 78.2 |
| +body          | <b>80.7 ± 0.3</b> | <b>80.5 ± 0.4</b> | <b>91.8 ± 0.3</b> | <b>89.8 ± 0.2</b> | 85.7 | +body              | <b>90.8 ± 0.2</b> | <b>87.3 ± 0.9</b> | <b>81.5 ± 0.7</b> | <b>79.5 ± 0.4</b> | 84.8 |
| +all           | <b>80.5 ± 0.1</b> | <b>80.2 ± 0.3</b> | <b>92.3 ± 0.2</b> | <b>89.9 ± 0.1</b> | 85.7 | +all               | <b>90.6 ± 0.4</b> | <b>86.9 ± 0.2</b> | <b>81.7 ± 0.2</b> | <b>78.9 ± 0.7</b> | 84.5 |



Table 25: Full results for fine-tuning DeiT.

| (a) VLCS |                   |                   |                   |                   |      | (b) PACS |                   |                   |                   |                   |      |
|----------|-------------------|-------------------|-------------------|-------------------|------|----------|-------------------|-------------------|-------------------|-------------------|------|
|          | C                 | L                 | S                 | V                 | Avg  |          | A                 | C                 | P                 | S                 | Avg  |
| ERM      | 97.3 ± 0.4        | 64.0 ± 0.6        | 76.9 ± 0.6        | 78.9 ± 0.8        | 79.3 | ERM      | 92.8 ± 0.5        | 83.8 ± 0.5        | 98.5 ± 0.1        | 76.2 ± 1.4        | 87.8 |
| +head    | <b>99.7 ± 0.2</b> | <b>72.1 ± 0.2</b> | <b>82.2 ± 0.7</b> | <b>86.8 ± 0.6</b> | 85.2 | +head    | <b>95.9 ± 0.1</b> | <b>94.1 ± 0.4</b> | <b>99.2 ± 0.1</b> | <b>91.5 ± 0.5</b> | 95.2 |
| +body    | <b>99.9 ± 0.0</b> | <b>77.3 ± 0.3</b> | <b>85.0 ± 0.2</b> | <b>88.4 ± 0.4</b> | 87.7 | +body    | <b>96.6 ± 0.4</b> | <b>96.0 ± 0.1</b> | <b>99.3 ± 0.1</b> | <b>94.6 ± 0.2</b> | 96.6 |
| +all     | <b>99.9 ± 0.0</b> | <b>77.3 ± 0.3</b> | <b>85.0 ± 0.2</b> | <b>88.4 ± 0.4</b> | 87.7 | +all     | <b>96.6 ± 0.4</b> | <b>96.1 ± 0.1</b> | <b>99.3 ± 0.1</b> | <b>94.6 ± 0.2</b> | 96.6 |

  

| (c) OfficeHome |                   |                   |                   |                   |      | (d) TerraIncognita |                   |                   |                   |                   |      |
|----------------|-------------------|-------------------|-------------------|-------------------|------|--------------------|-------------------|-------------------|-------------------|-------------------|------|
|                | A                 | C                 | P                 | R                 | Avg  |                    | L100              | L38               | L43               | L46               | Avg  |
| ERM            | 74.5 ± 0.2        | 63.3 ± 0.6        | 83.2 ± 0.2        | 85.5 ± 0.2        | 76.6 | ERM                | 57.5 ± 2.9        | 44.0 ± 2.0        | 56.0 ± 0.4        | 42.3 ± 0.8        | 50.0 |
| +head          | <b>78.6 ± 0.3</b> | <b>75.4 ± 0.1</b> | <b>89.5 ± 0.0</b> | <b>87.3 ± 0.2</b> | 82.7 | +head              | <b>88.5 ± 0.3</b> | <b>84.5 ± 0.1</b> | <b>79.3 ± 0.5</b> | <b>75.6 ± 0.2</b> | 82.0 |
| +body          | <b>80.9 ± 0.0</b> | <b>79.7 ± 0.2</b> | <b>91.0 ± 0.2</b> | <b>88.4 ± 0.1</b> | 85.0 | +body              | <b>90.8 ± 0.4</b> | <b>88.9 ± 0.3</b> | <b>83.6 ± 0.3</b> | <b>82.1 ± 0.1</b> | 86.3 |
| +all           | <b>80.9 ± 0.0</b> | <b>79.7 ± 0.2</b> | <b>91.0 ± 0.2</b> | <b>88.5 ± 0.1</b> | 85.0 | +all               | <b>90.8 ± 0.4</b> | <b>88.7 ± 0.0</b> | <b>83.6 ± 0.1</b> | <b>81.7 ± 0.4</b> | 86.2 |

Table 26: Full results for fine-tuning HViT.

| (a) VLCS |                   |                   |                   |                   |      | (b) PACS |                   |                   |                   |                   |      |
|----------|-------------------|-------------------|-------------------|-------------------|------|----------|-------------------|-------------------|-------------------|-------------------|------|
|          | C                 | L                 | S                 | V                 | Avg  |          | A                 | C                 | P                 | S                 | Avg  |
| ERM      | 96.8 ± 0.5        | 64.1 ± 0.9        | 75.9 ± 1.1        | 80.0 ± 1.2        | 79.2 | ERM      | 89.5 ± 1.4        | 85.9 ± 2.6        | 98.0 ± 0.5        | 85.5 ± 1.1        | 89.7 |
| +head    | <b>99.6 ± 0.1</b> | <b>76.9 ± 1.0</b> | <b>83.1 ± 0.2</b> | <b>87.3 ± 0.8</b> | 86.7 | +head    | <b>93.1 ± 0.5</b> | <b>93.7 ± 0.6</b> | <b>98.6 ± 0.3</b> | <b>92.3 ± 0.0</b> | 94.4 |
| +body    | <b>99.8 ± 0.0</b> | <b>77.0 ± 0.2</b> | <b>84.1 ± 0.3</b> | <b>88.7 ± 0.3</b> | 87.4 | +body    | <b>96.0 ± 0.2</b> | <b>97.3 ± 0.4</b> | <b>99.0 ± 0.1</b> | <b>95.4 ± 0.2</b> | 96.9 |
| +all     | <b>99.8 ± 0.0</b> | <b>77.2 ± 0.3</b> | <b>84.7 ± 0.4</b> | <b>88.5 ± 0.4</b> | 87.6 | +all     | <b>96.0 ± 0.3</b> | <b>97.2 ± 0.4</b> | <b>98.9 ± 0.1</b> | <b>95.3 ± 0.0</b> | 96.8 |

  

| (c) OfficeHome |                   |                   |                   |                   |      | (d) TerraIncognita |                   |                   |                   |                   |      |
|----------------|-------------------|-------------------|-------------------|-------------------|------|--------------------|-------------------|-------------------|-------------------|-------------------|------|
|                | A                 | C                 | P                 | R                 | Avg  |                    | L100              | L38               | L43               | L46               | Avg  |
| ERM            | 77.3 ± 1.2        | 68.4 ± 0.6        | 87.0 ± 0.2        | 87.5 ± 0.3        | 80.0 | ERM                | 62.3 ± 2.2        | 44.6 ± 0.5        | 56.6 ± 0.6        | 41.9 ± 1.0        | 51.4 |
| +head          | <b>80.4 ± 1.4</b> | <b>77.0 ± 0.4</b> | <b>90.3 ± 0.1</b> | <b>89.1 ± 0.1</b> | 84.2 | +head              | <b>88.8 ± 0.5</b> | <b>83.9 ± 0.1</b> | <b>79.0 ± 0.7</b> | <b>75.3 ± 0.3</b> | 81.8 |
| +body          | <b>82.6 ± 0.9</b> | <b>83.3 ± 0.4</b> | <b>92.7 ± 0.3</b> | <b>89.9 ± 0.3</b> | 87.1 | +body              | <b>91.4 ± 0.4</b> | <b>89.7 ± 0.2</b> | <b>83.0 ± 0.8</b> | <b>81.8 ± 0.6</b> | 86.5 |
| +all           | <b>82.7 ± 0.9</b> | <b>83.2 ± 0.5</b> | <b>93.0 ± 0.1</b> | <b>89.7 ± 0.4</b> | 87.2 | +all               | <b>91.8 ± 0.1</b> | <b>89.2 ± 0.1</b> | <b>82.4 ± 0.5</b> | <b>82.4 ± 0.2</b> | 86.4 |

Table 27: Full results for fine-tuning Mixer-L16.

| (a) VLCS |                   |                   |                   |                   |      | (b) PACS |                   |                   |                   |                   |      |
|----------|-------------------|-------------------|-------------------|-------------------|------|----------|-------------------|-------------------|-------------------|-------------------|------|
|          | C                 | L                 | S                 | V                 | Avg  |          | A                 | C                 | P                 | S                 | Avg  |
| ERM      | 98.8 ± 0.2        | 61.0 ± 0.4        | 72.5 ± 0.9        | 73.5 ± 0.3        | 76.4 | ERM      | 79.9 ± 3.2        | 80.3 ± 0.8        | 97.6 ± 0.4        | 67.5 ± 0.3        | 81.3 |
| +head    | <b>99.6 ± 0.1</b> | <b>72.8 ± 0.4</b> | <b>80.6 ± 0.5</b> | <b>83.7 ± 0.4</b> | 84.2 | +head    | <b>89.6 ± 1.2</b> | <b>90.9 ± 0.5</b> | <b>98.5 ± 0.1</b> | <b>81.5 ± 0.8</b> | 90.1 |
| +body    | <b>99.7 ± 0.1</b> | <b>73.9 ± 0.2</b> | <b>81.2 ± 0.4</b> | <b>84.2 ± 0.3</b> | 84.8 | +body    | <b>90.4 ± 0.7</b> | <b>93.6 ± 0.3</b> | 96.6 ± 0.5        | <b>86.3 ± 0.5</b> | 91.7 |
| +all     | <b>99.6 ± 0.2</b> | <b>74.2 ± 0.1</b> | <b>81.0 ± 0.4</b> | <b>83.7 ± 0.6</b> | 84.6 | +all     | <b>90.8 ± 0.7</b> | <b>93.7 ± 0.4</b> | 96.5 ± 0.5        | <b>86.7 ± 1.7</b> | 91.9 |

  

| (c) OfficeHome |                   |                   |                   |                   |      | (d) TerraIncognita |                   |                   |                   |                   |      |
|----------------|-------------------|-------------------|-------------------|-------------------|------|--------------------|-------------------|-------------------|-------------------|-------------------|------|
|                | A                 | C                 | P                 | R                 | Avg  |                    | L100              | L38               | L43               | L46               | Avg  |
| ERM            | 69.9 ± 2.4        | 51.3 ± 6.4        | 81.7 ± 1.6        | 74.9 ± 4.5        | 69.4 | ERM                | 43.5 ± 1.6        | 24.9 ± 2.0        | 45.2 ± 0.2        | 34.6 ± 1.0        | 37.1 |
| +head          | <b>74.3 ± 1.7</b> | <b>67.0 ± 4.7</b> | <b>88.4 ± 0.8</b> | <b>79.0 ± 3.7</b> | 77.2 | +head              | <b>87.5 ± 0.3</b> | <b>79.9 ± 0.9</b> | <b>76.3 ± 0.6</b> | <b>67.6 ± 0.4</b> | 77.8 |
| +body          | <b>73.5 ± 0.6</b> | <b>71.3 ± 4.2</b> | <b>87.7 ± 0.5</b> | <b>81.1 ± 2.9</b> | 78.4 | +body              | <b>90.1 ± 0.2</b> | <b>85.4 ± 0.2</b> | <b>80.3 ± 0.1</b> | <b>76.7 ± 0.3</b> | 83.1 |
| +all           | <b>73.2 ± 0.7</b> | <b>71.7 ± 4.2</b> | <b>88.2 ± 0.4</b> | <b>80.3 ± 2.6</b> | 78.4 | +all               | <b>89.8 ± 0.1</b> | <b>85.6 ± 0.2</b> | <b>80.8 ± 0.3</b> | <b>76.6 ± 0.9</b> | 83.2 |

### B.3.2 Prediction entropy on seen and unseen domains

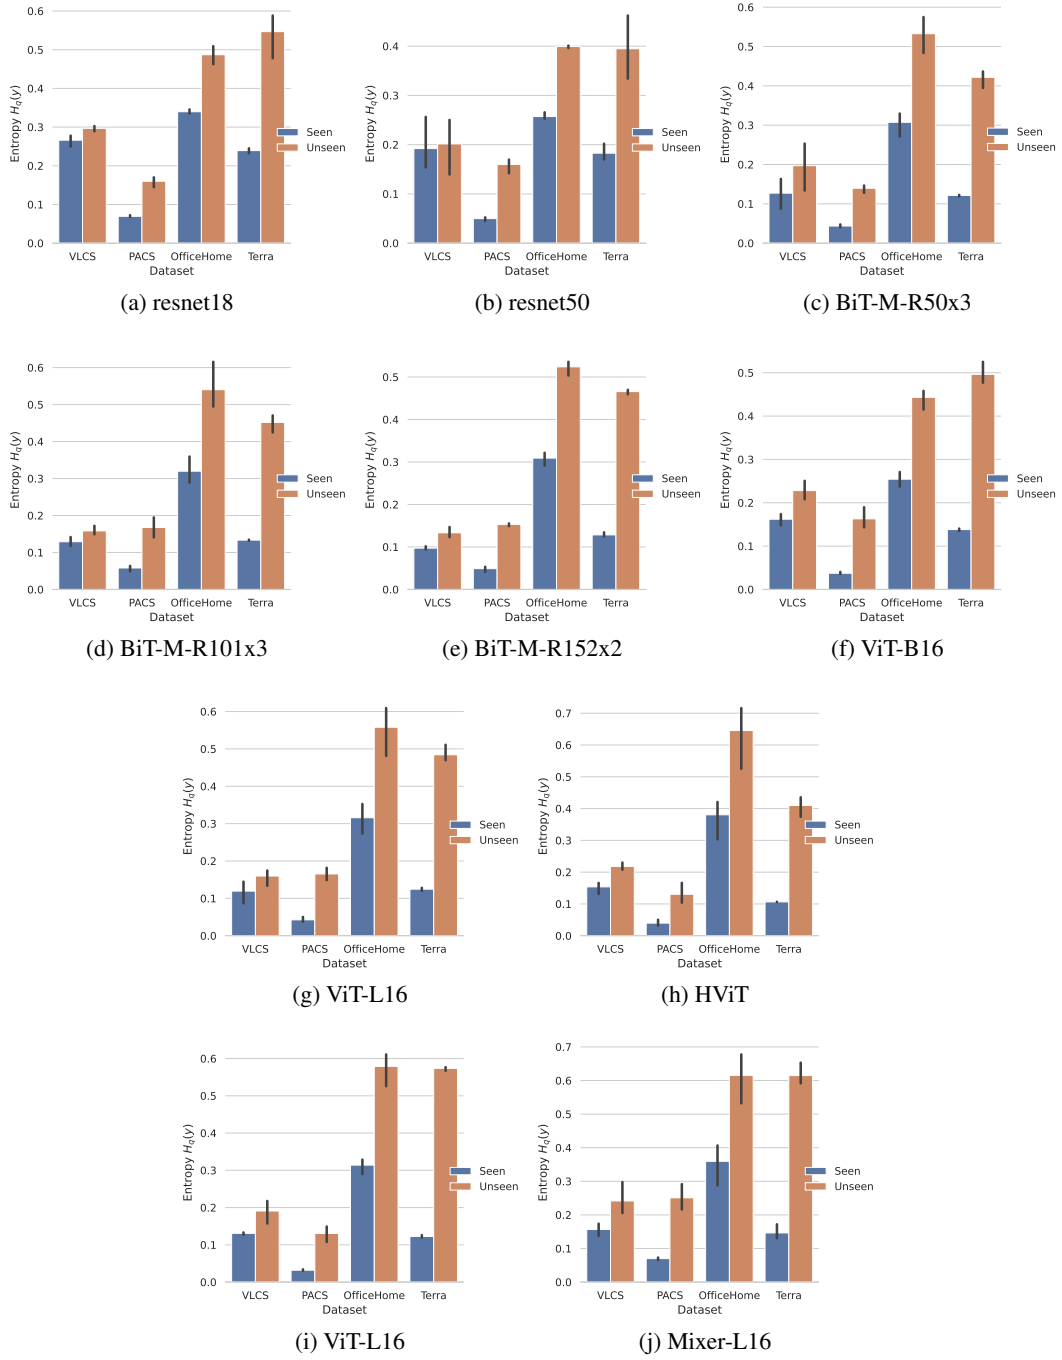

Figure 3: Full results for Figure 1-b. Each figure corresponds to the results of different backbone networks.

## B.4 Tent vs. T3A in entropy

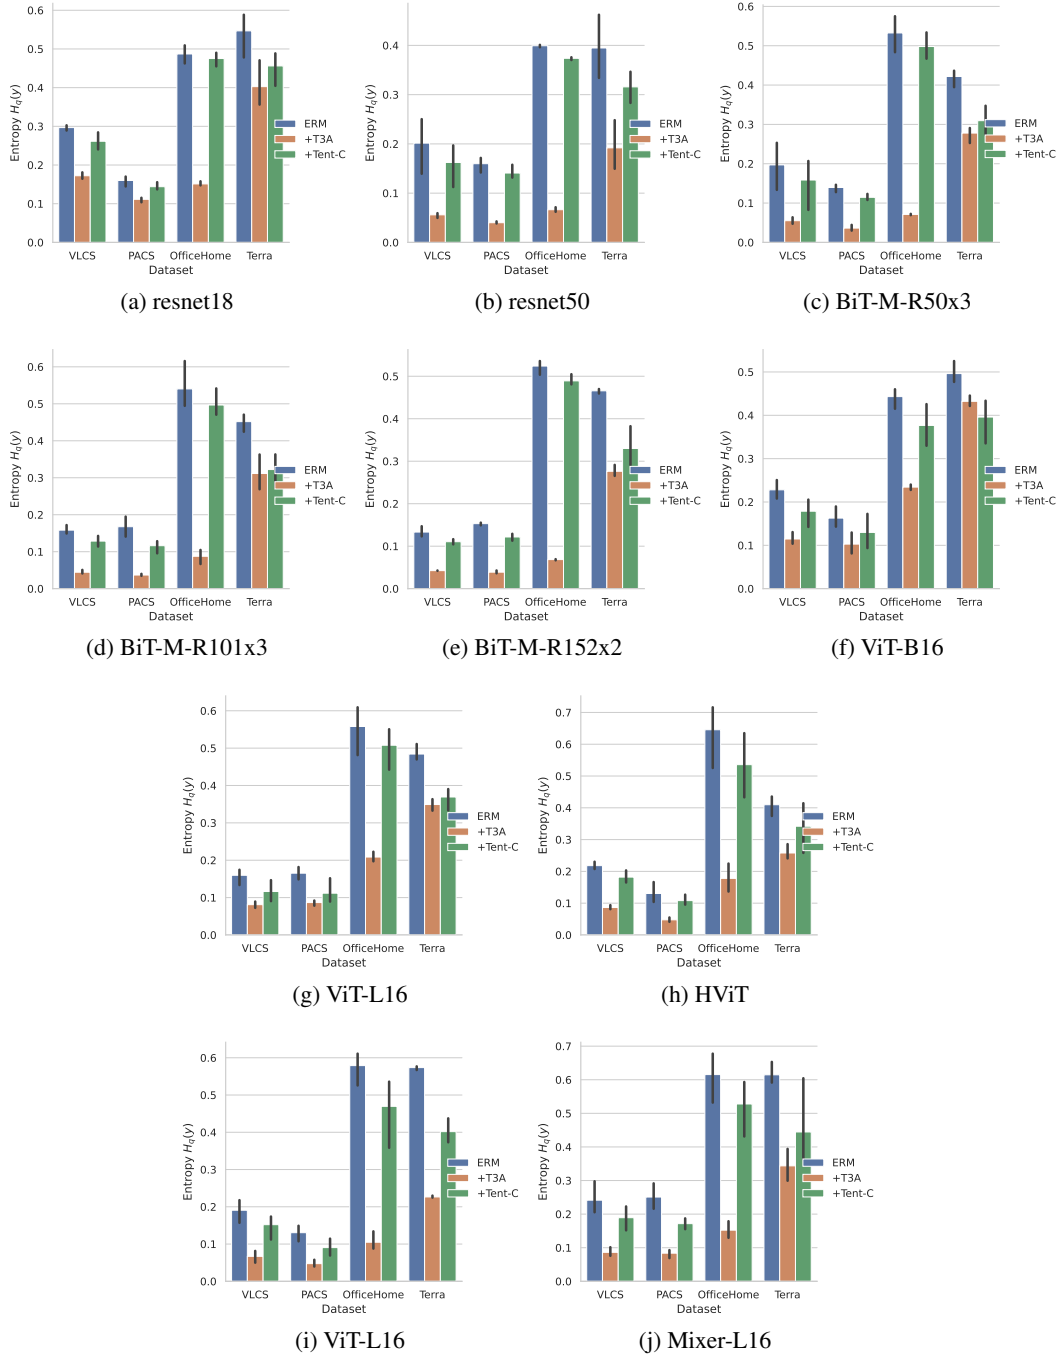

Figure 4: Full results for Figure 1-c. Each figure corresponds to the results of different backbone networks.

## C Comparing T3A with Other Test-Time Adaptation Methods using Oracle Model Selection

Table 28: Comparison of our method and existing test-time adaptation methods. Unlike Table 3, the results here select the hyper-parameter in the test-domain validation set (Oracle setup [17]). As with Table 3, this experiments is conducted only on the default hyperparameters of ERM. Bold type indicates performance improvement, and \* indicates statistical significance in paired t-test (\* indicates  $p \leq 0.05$ ).

| Models      | VLCS              | PACS              | OfficeHome        | Terra             | Avg    |
|-------------|-------------------|-------------------|-------------------|-------------------|--------|
| resnet18-BN | 73.0 ± 0.6        | 79.5 ± 0.4        | 61.8 ± 0.3        | 41.7 ± 0.9        | 64.0   |
| SHOTIM      | 60.8 ± 0.3        | <b>81.5 ± 0.2</b> | <b>62.4 ± 0.3</b> | 29.5 ± 1.3        | 58.6   |
| SHOT        | 61.2 ± 0.4        | <b>81.4 ± 0.2</b> | <b>62.4 ± 0.3</b> | 32.3 ± 0.6        | 59.3   |
| PseudoLabel | 65.4 ± 0.2        | 73.1 ± 2.5        | 54.7 ± 4.6        | 37.7 ± 2.5        | 57.7   |
| PLClf       | 72.5 ± 1.3        | 78.4 ± 0.8        | 61.8 ± 0.3        | <b>43.9 ± 1.3</b> | 64.2   |
| TentFull    | <b>73.8 ± 0.8</b> | <b>84.7 ± 0.2</b> | <b>62.7 ± 0.1</b> | 37.4 ± 0.8        | 64.7   |
| TentNorm    | 70.3 ± 0.9        | <b>82.7 ± 0.1</b> | <b>62.1 ± 0.1</b> | 36.6 ± 0.2        | 62.9   |
| TentClf     | 72.3 ± 1.1        | 77.3 ± 1.8        | 61.3 ± 0.3        | 37.8 ± 2.7        | 62.2   |
| TentPreBN   | 64.7 ± 0.7        | <b>81.2 ± 0.2</b> | <b>62.6 ± 0.3</b> | 36.4 ± 1.0        | 61.2   |
| T3A         | <b>73.8 ± 0.8</b> | <b>81.3 ± 0.0</b> | <b>62.8 ± 0.3</b> | 40.5 ± 0.3        | 64.6*  |
| resnet50-BN | 74.3 ± 0.5        | 84.1 ± 0.1        | 66.9 ± 0.2        | 45.8 ± 1.8        | 67.8   |
| SHOTIM      | 55.2 ± 4.6        | 83.7 ± 0.2        | <b>67.5 ± 0.2</b> | 27.0 ± 1.4        | 58.3   |
| SHOT        | 61.4 ± 1.5        | <b>85.1 ± 0.4</b> | <b>67.5 ± 0.3</b> | 30.9 ± 2.3        | 61.2   |
| PseudoLabel | 64.2 ± 2.3        | 70.4 ± 1.0        | 55.0 ± 1.8        | 33.0 ± 7.4        | 55.6   |
| PLClf       | 73.5 ± 0.9        | <b>84.6 ± 0.4</b> | 66.7 ± 0.2        | <b>46.7 ± 1.6</b> | 67.9   |
| TentFull    | <b>74.8 ± 1.2</b> | <b>87.7 ± 0.1</b> | <b>67.0 ± 0.4</b> | 42.9 ± 0.2        | 68.1   |
| TentNorm    | 71.4 ± 0.5        | <b>85.7 ± 0.1</b> | 66.6 ± 0.0        | 42.4 ± 0.4        | 66.5   |
| TentClf     | 72.6 ± 0.8        | 83.3 ± 0.5        | 66.7 ± 0.2        | 45.0 ± 0.9        | 66.9   |
| TentPreBN   | 65.7 ± 1.4        | <b>84.9 ± 0.0</b> | <b>67.7 ± 0.2</b> | 42.7 ± 0.5        | 65.3   |
| T3A         | <b>76.1 ± 0.2</b> | <b>85.2 ± 0.2</b> | <b>67.8 ± 0.2</b> | <b>46.0 ± 1.5</b> | 68.8** |

## D ImageNet Top-1 Accuracy vs. DG Performance

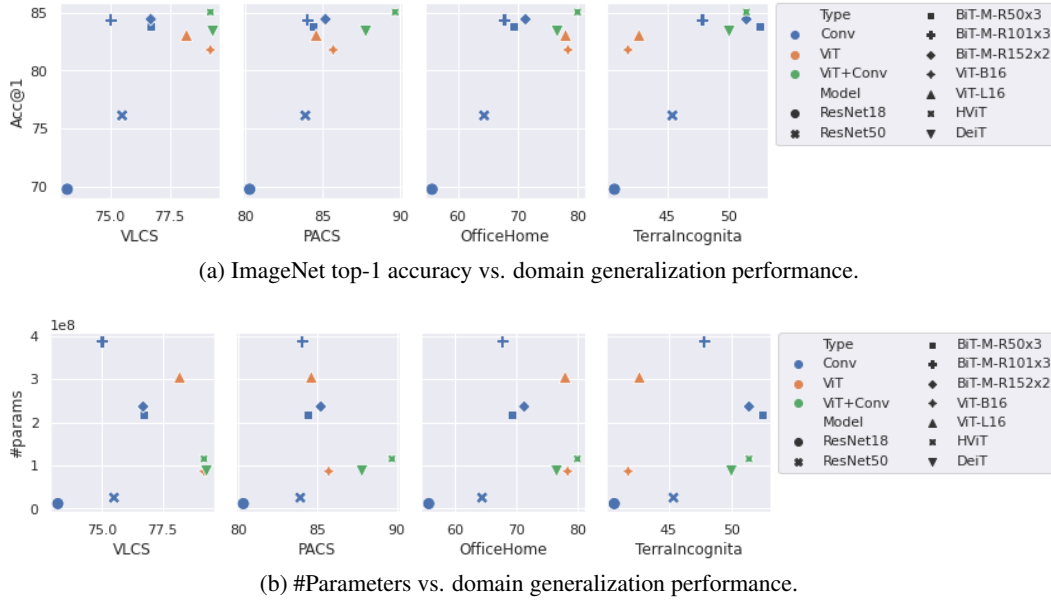

Figure 5: Comparing domain generalization performance on four datasets and properties of the pretrained models. (a) ImageNet top-1 accuracy of each backbone networks vs. domain generalization performance. (b) The number of parameters of each backbone networks vs. domain generalization performance.

Figure 5 illustrates the correlation between domain generalization performance on each dataset and properties of the backbone networks (ImageNet top-1 accuracy and the number of parameters). For visualization, we split backbone networks into (1) Conv (blue): pure convolution (ResNet18, ResNet50, and BiT), (2) ViT (orange): pure vision transformer (ViT-B16 and ViT-L16), and (3) ViT+Conv (green): hybrid of convolution and transformer (HViT and DeiT). Note that, DeiT does not use convolution in the architecture design, but it distills the knowledge from the convolution-based model during training. Each marker corresponds to different backbone networks.

We can make the following observations. (1) Looking only at Conv, there is a correlation between the performance of the ImageNet and the performance of DG, but there is no correlation across architectures. (2) ViT+Conv models work well on all datasets. ViT models also significantly outperform Conv models in VLCS and OfficeHome but perform significantly worse in TerraIncognita datasets. (3) There is no correlation between the number of parameters and domain generalization performance. While most literature in DG focuses on ResNet50, this result suggests the practical importance of choosing the network structure according to the datasets and methods that can improve the performance regardless of the model.
